# Supplementary material
Source: MDPI journal article supplement (https://www.mdpi.com/2071-1050/14/11/6821)
Supplement: s1 [file s1]

Table S1. LCI-based emergy required to produce 1 kg of crude oil.

|        |                          | LCI - RAW DATA            |                       |       |                                          |
|--------|--------------------------|---------------------------|-----------------------|-------|------------------------------------------|
| INPUTS |                          | QUANTITY                  | UEV                   | UNIT  | EMERGY                                   |
| 1      | Crude oil                | $4.52695 \times 10^1$     | $9.45 \times 10^4$    | sej/J | $4.28 \times 10^{12}$                    |
| 2      | Gas/condensate           | $1.50526 \times 10^0$     | $6.83 \times 10^4$    | sej/J | $1.03 \times 10^{11}$                    |
| 3      | Coal                     | $3.20801 \times 10^{-1}$  | $5.71 \times 10^4$    | sej/J | $1.83 \times 10^{10}$                    |
| 5      | Lignite                  | $2.76290 \times 10^{-8}$  | $6.22 \times 10^4$    | sej/J | $1.72 \times 10^3$                       |
| 6      | Peat                     | $1.30952 \times 10^{-7}$  | $3.19 \times 10^4$    | sej/J | $4.18 \times 10^3$                       |
| 7      | Wood                     | $1.46879 \times 10^{-9}$  | $1.04 \times 10^4$    | sej/J | $1.53 \times 10^1$                       |
| 8      | Hydro                    | $5.80197 \times 10^{-3}$  | $1.35 \times 10^5$    | sej/J | $7.82 \times 10^8$                       |
| 9      | Nuclear                  | $2.22896 \times 10^{-1}$  | $3.14 \times 10^5$    | sej/J | $7.00 \times 10^{10}$                    |
| 10     | Sulphur                  | $1.57248 \times 10^{-7}$  | $2.08 \times 10^{10}$ | sej/g | $3.57 \times 10^5$                       |
| 11     | Biomass                  | $1.67076 \times 10^{-2}$  | $6.75 \times 10^4$    | sej/J | $1.13 \times 10^9$                       |
| 12     | Hydrogen                 | $2.76997 \times 10^{-8}$  | $1.15 \times 10^5$    | sej/J | $3.19 \times 10^3$                       |
| 13     | Geothermal               | $2.53886 \times 10^{-6}$  | $4.52 \times 10^5$    | sej/J | $1.15 \times 10^6$                       |
| 14     | Solar                    | $9.50301 \times 10^{-9}$  | $7.93 \times 10^4$    | sej/J | $7.54 \times 10^2$                       |
| 15     | Wave/tidal               | $8.70798 \times 10^{-6}$  | $2.83 \times 10^4$    | sej/J | $2.46 \times 10^5$                       |
| 16     | Wind                     | $7.86566 \times 10^{-4}$  | $9.90 \times 10^4$    | sej/J | $7.78 \times 10^7$                       |
| 17     | Air                      | $3.70152 \times 10^{-1}$  | $8.67 \times 10^7$    | sej/g | $3.21 \times 10^4$                       |
| 18     | Barytes                  | $2.62998 \times 10^{-3}$  | $1.68 \times 10^9$    | sej/g | $4.42 \times 10^3$                       |
| 19     | Bauxite                  | $1.81013 \times 10^{-2}$  | $1.44 \times 10^9$    | sej/g | $2.60 \times 10^4$                       |
| 20     | Bentonite                | $3.30838 \times 10^{-3}$  | $4.80 \times 10^9$    | sej/g | $1.59 \times 10^4$                       |
| 21     | Calcium sulphate (CaSO4) | $2.45548 \times 10^{-5}$  | $1.68 \times 10^9$    | sej/g | $4.13 \times 10^1$                       |
| 22     | Chalk (CaCO3)            | $4.92569 \times 10^{-29}$ | $1.13 \times 10^7$    | sej/g | $5.54 \times 10^{-25}$                   |
| 23     | Clay                     | $4.42704 \times 10^{-6}$  | $4.80 \times 10^9$    | sej/g | $2.13 \times 10^1$                       |
| 24     | Chromium (Cr)            | $6.84688 \times 10^{-8}$  | $1.50 \times 10^{11}$ | sej/g | $1.03 \times 10^1$                       |
| 25     | Copper (Cu)              | $1.84838 \times 10^{-6}$  | $9.80 \times 10^{10}$ | sej/g | $1.81 \times 10^2$                       |
| 26     | Dolomite                 | $5.37885 \times 10^{-2}$  | $1.85 \times 10^{10}$ | sej/g | $9.95 \times 10^5$                       |
| 27     | Iron (Fe)                | $4.40180 \times 10^0$     | $1.20 \times 10^{10}$ | sej/g | $5.28 \times 10^7$                       |
| 28     | Feldspar                 | $9.31988 \times 10^{-34}$ | $1.68 \times 10^9$    | sej/g | $1.57 \times 10^{-27}$                   |
| 29     | Ferromanganese           | $3.99812 \times 10^{-3}$  | $3.50 \times 10^{11}$ | sej/g | $1.40 \times 10^6$                       |
| 30     | Fluorspar                | $3.26753 \times 10^{-4}$  | $8.36 \times 10^8$    | sej/g | $2.73 \times 10^2$                       |
| 31     | Granite                  | $3.02114 \times 10^{-10}$ | $8.40 \times 10^8$    | sej/g | $2.54 \times 10^{-4}$                    |
| 32     | Gravel                   | $1.62408 \times 10^{-2}$  | $8.40 \times 10^8$    | sej/g | $1.36 \times 10^4$                       |
| 33     | Mercury (Hg)             | $4.24591 \times 10^{-8}$  | $4.20 \times 10^{13}$ | sej/g | $1.78 \times 10^3$                       |
| 34     | Limestone                | $9.20142 \times 10^{-1}$  | $1.68 \times 10^9$    | sej/g | $1.55 \times 10^6$                       |
| 35     | N2                       | $3.39154 \times 10^{-1}$  | $1.17 \times 10^{10}$ | sej/g | $3.96 \times 10^6$                       |
| 36     | Nickel (Ni)              | $2.95168 \times 10^{-11}$ | $2.00 \times 10^{11}$ | sej/g | $5.90 \times 10^{-3}$                    |
| 37     | Oxygen (O2)              | $8.06923 \times 10^{-2}$  | $8.67 \times 10^7$    | sej/g | $7.00 \times 10^3$                       |
| 38     | Olivine                  | $4.12963 \times 10^{-2}$  | $1.68 \times 10^9$    | sej/g | $6.94 \times 10^4$                       |
| 39     | Lead (Pb)                | $3.38422 \times 10^{-2}$  | $4.80 \times 10^{11}$ | sej/g | $1.62 \times 10^7$                       |
| 40     | Phosphate as P2O5        | $8.37819 \times 10^{-9}$  | $2.99 \times 10^{10}$ | sej/g | $2.50 \times 10^{-1}$                    |
| 41     | Potassium chloride (KCl) | $1.36913 \times 10^{-4}$  | $4.97 \times 10^9$    | sej/g | $6.81 \times 10^2$                       |
| 42     | Rutile                   | $7.07568 \times 10^{-29}$ | $1.68 \times 10^9$    | sej/g | $1.19 \times 10^{-22}$                   |
| 43     | Sulphur                  | $1.70455 \times 10^{-2}$  | $2.08 \times 10^{10}$ | sej/g | $3.55 \times 10^5$                       |
| 44     | Sand (SiO2)              | $8.28356 \times 10^{-5}$  | $1.68 \times 10^9$    | sej/g | $1.39 \times 10^2$                       |
| 45     | Shale                    | $6.95354 \times 10^{-5}$  | $1.68 \times 10^9$    | sej/g | $1.17 \times 10^2$                       |
| 46     | Sodium chloride (NaCl)   | $8.84022 \times 10^{-2}$  | $1.68 \times 10^9$    | sej/g | $1.49 \times 10^5$                       |
| 47     | Talc                     | $5.88669 \times 10^{-23}$ | $2.80 \times 10^{10}$ | sej/g | $1.65 \times 10^{-15}$                   |
| 48     | Zn                       | $1.23543 \times 10^{-3}$  | $7.20 \times 10^{10}$ | sej/g | $8.90 \times 10^4$                       |
| 49     | Water-Public supply      | $7.86334 \times 10^1$     | $5.51 \times 10^5$    | sej/J | $1.81 \times 10^5$                       |
| 50     | Water-River canal        | $2.11663 \times 10^{-1}$  | $3.41 \times 10^5$    | sej/g | $7.22 \times 10^1$                       |
| 51     | Water-Sea                | $2.00494 \times 10^1$     | $5.36 \times 10^4$    | sej/J | $4.50 \times 10^3$                       |
| 52     | Water-Well               | $2.06638 \times 10^{-2}$  | $6.89 \times 10^4$    | sej/J | $5.96 \times 10^0$                       |
| 53     | Water-Unspecified        | $1.56479 \times 10^4$     | $3.06 \times 10^4$    | sej/J | $2.00 \times 10^6$                       |
|        |                          |                           | <b>Emergy sej/kg</b>  |       | <b><math>4.472 \times 10^{12}</math></b> |
|        |                          |                           | <b>UEV sej/g</b>      |       | <b><math>4.472 \times 10^9</math></b>    |

Table S2. LCI-based emergy required to produce 1 kg of natural gas.

|        |                | LCI - RAW DATA           |                       |       |                       |
|--------|----------------|--------------------------|-----------------------|-------|-----------------------|
| INPUTS |                | QUANTITY                 | UEV                   | UNIT  | EMERGY                |
| 1      | Crude oil      | 0.276191523              | 94529.02              | sej/J | $2.61 \times 10^{10}$ |
| 2      | Gas/condensate | $5.63155 \times 10^1$    | $6.83 \times 10^4$    | sej/J | $3.84 \times 10^{12}$ |
| 3      | Coal           | $9.35411 \times 10^{-1}$ | $5.71 \times 10^4$    | sej/J | $5.34 \times 10^{10}$ |
| 5      | Lignite        | $6.17164 \times 10^{-8}$ | $6.22 \times 10^4$    | sej/J | 3836.292              |
| 6      | Peat           | $1.17160 \times 10^{-7}$ | $3.19 \times 10^4$    | sej/J | 3739.753              |
| 7      | Wood           | $3.28091 \times 10^{-9}$ | $1.04 \times 10^4$    | sej/J | 34.12434              |
| 8      | Hydro          | $1.70886 \times 10^{-2}$ | $1.35 \times 10^5$    | sej/J | $2.3 \times 10^9$     |
| 9      | Nuclear        | $6.61175 \times 10^{-1}$ | $3.14 \times 10^5$    | sej/J | $2.08 \times 10^{11}$ |
| 10     | Sulphur        | $3.51254 \times 10^{-7}$ | $2.08 \times 10^{10}$ | sej/g | 797817.6              |

|    |                          |                           |                       |                      |                                         |
|----|--------------------------|---------------------------|-----------------------|----------------------|-----------------------------------------|
| 11 | Biomass                  | $4.95686 \times 10^{-2}$  | $6.75 \times 10^4$    | sej/J                | $3.35 \times 10^9$                      |
| 12 | Hydrogen                 | $6.18744 \times 10^{-8}$  | $1.15 \times 10^5$    | sej/J                | 7115.553                                |
| 13 | Geothermal               | $6.66876 \times 10^{-6}$  | $4.52 \times 10^5$    | sej/J                | 3013746                                 |
| 14 | Solar                    | $2.60784 \times 10^{-8}$  | $7.93 \times 10^4$    | sej/J                | 2068.017                                |
| 15 | Wave/tidal               | $2.58125 \times 10^{-5}$  | $2.83 \times 10^4$    | sej/J                | 730352.3                                |
| 16 | Wind                     | $2.33325 \times 10^{-3}$  | $9.90 \times 10^4$    | sej/J                | $2.31 \times 10^8$                      |
| 17 | Air                      | $8.26829 \times 10^{-1}$  | $8.67 \times 10^7$    | sej/g                | 71676.17                                |
| 18 | Barytes                  | $5.87473 \times 10^{-3}$  | $1.68 \times 10^9$    | sej/g                | 9869.554                                |
| 19 | Bauxite                  | $4.04340 \times 10^{-2}$  | $1.44 \times 10^9$    | sej/g                | 58079.36                                |
| 20 | Bentonite                | $7.39012 \times 10^{-3}$  | $4.80 \times 10^9$    | sej/g                | 35508.04                                |
| 21 | Calcium sulphate (CaSO4) | $5.48493 \times 10^{-5}$  | $1.68 \times 10^9$    | sej/g                | 92.14688                                |
| 22 | Chalk (CaCO3)            | $1.10028 \times 10^{-28}$ | $1.13 \times 10^7$    | sej/g                | $1.24 \times 10^{-24}$                  |
| 23 | Clay                     | $9.88892 \times 10^{-6}$  | $4.80 \times 10^9$    | sej/g                | 47.51429                                |
| 24 | Chromium (Cr)            | $1.52943 \times 10^{-7}$  | $1.50 \times 10^{11}$ | sej/g                | 22.94141                                |
| 25 | Copper (Cu)              | $4.12882 \times 10^{-6}$  | $9.80 \times 10^{10}$ | sej/g                | 404.6247                                |
| 26 | Dolomite                 | $1.20150 \times 10^{-1}$  | $1.85 \times 10^{10}$ | sej/g                | 2222783                                 |
| 27 | Iron (Fe)                | $9.83256 \times 10^0$     | $1.20 \times 10^{10}$ | sej/g                | $1.18 \times 10^8$                      |
| 28 | Feldspar                 | $2.08183 \times 10^{-33}$ | $1.68 \times 10^9$    | sej/g                | $3.5 \times 10^{-27}$                   |
| 29 | Ferromanganese           | $8.93083 \times 10^{-3}$  | $3.50 \times 10^{11}$ | sej/g                | 3125790                                 |
| 30 | Fluorspar                | $7.29887 \times 10^{-4}$  | $8.36 \times 10^8$    | sej/g                | 610.2491                                |
| 31 | Granite                  | $6.74849 \times 10^{-10}$ | $8.40 \times 10^8$    | sej/g                | 0.000567                                |
| 32 | Gravel                   | $3.62780 \times 10^{-2}$  | $8.40 \times 10^8$    | sej/g                | 30473.48                                |
| 33 | Mercury (Hg)             | $9.48433 \times 10^{-8}$  | $4.20 \times 10^{13}$ | sej/g                | 3983.42                                 |
| 34 | Limestone                | $2.05537 \times 10^0$     | $1.68 \times 10^9$    | sej/g                | 3453026                                 |
| 35 | N2                       | $7.57587 \times 10^{-1}$  | $1.17 \times 10^{10}$ | sej/g                | 8841868                                 |
| 36 | Nickel (Ni)              | $6.59334 \times 10^{-11}$ | $2.00 \times 10^{11}$ | sej/g                | 0.013187                                |
| 37 | Oxygen (O2)              | $1.80247 \times 10^{-1}$  | $8.67 \times 10^7$    | sej/g                | 15625.24                                |
| 38 | Olivine                  | $9.22458 \times 10^{-2}$  | $1.68 \times 10^9$    | sej/g                | 154973                                  |
| 39 | Lead (Pb)                | $7.55953 \times 10^{-2}$  | $4.80 \times 10^{11}$ | sej/g                | 36285737                                |
| 40 | Phosphate as P2O5        | $1.87148 \times 10^{-8}$  | $2.99 \times 10^{10}$ | sej/g                | 0.55883                                 |
| 41 | Potassium chloride (KCl) | $3.05831 \times 10^{-4}$  | $4.97 \times 10^9$    | sej/g                | 1520.837                                |
| 42 | Rutile                   | $1.58053 \times 10^{-28}$ | $1.68 \times 10^9$    | sej/g                | $2.66 \times 10^{-22}$                  |
| 43 | Sulphur                  | $3.80755 \times 10^{-2}$  | $2.08 \times 10^{10}$ | sej/g                | 792613.2                                |
| 44 | Sand (SiO2)              | $1.85035 \times 10^{-4}$  | $1.68 \times 10^9$    | sej/g                | 310.8581                                |
| 45 | Shale                    | $1.55325 \times 10^{-4}$  | $1.68 \times 10^9$    | sej/g                | 260.9462                                |
| 46 | Sodium chloride (NaCl)   | $1.97469 \times 10^{-1}$  | $1.68 \times 10^9$    | sej/g                | 331747.9                                |
| 47 | Talc                     | $4.51913 \times 10^{-23}$ | $2.80 \times 10^{10}$ | sej/g                | $1.26 \times 10^{-15}$                  |
| 48 | Zn                       | $2.75965 \times 10^{-3}$  | $7.20 \times 10^{10}$ | sej/g                | 198694.9                                |
| 49 | Water-Public supply      | $1.75648 \times 10^2$     | $5.51 \times 10^5$    | sej/J                | 181380.1                                |
| 50 | Water-River canal        | $4.72803 \times 10^{-1}$  | $3.41 \times 10^5$    | sej/g                | 161.2446                                |
| 51 | Water-Sea                | $4.47855 \times 10^1$     | $5.36 \times 10^4$    | sej/J                | 4497.806                                |
| 52 | Water-Well               | $4.61580 \times 10^{-2}$  | $6.89 \times 10^4$    | sej/J                | 5.958038                                |
| 53 | Water-Unspecified        | $3.47824 \times 10^4$     | $3.06 \times 10^4$    | sej/J                | 2002790                                 |
|    |                          |                           |                       | <b>Emergy sej/kg</b> | <b><math>4.14 \times 10^{12}</math></b> |
|    |                          |                           |                       | <b>UEV sej/g</b>     | <b><math>4.14 \times 10^9</math></b>    |

Table S3. LCI-based emergy required to produce 1 kg of naphta.

|        |                 | LCI - RAW DATA           |                       |       |                       |
|--------|-----------------|--------------------------|-----------------------|-------|-----------------------|
| INPUTS |                 | QUANTITY                 | UEV                   | UNIT  | EMERGY                |
| 1      | Crude oil       | $4.80484 \times 10^1$    | $9.45 \times 10^4$    | sej/J | $4.54 \times 10^{12}$ |
| 2      | Gas/condensate  | $1.62489 \times 10^0$    | $6.83 \times 10^4$    | sej/J | $1.11 \times 10^{11}$ |
| 3      | Coal            | $3.56655 \times 10^{-1}$ | $5.71 \times 10^4$    | sej/J | $2.04 \times 10^{10}$ |
| 5      | Lignite         | $6.45137 \times 10^{-8}$ | $6.22 \times 10^4$    | sej/J | $4.01 \times 10^3$    |
| 6      | Peat            | $2.55344 \times 10^{-7}$ | $3.19 \times 10^4$    | sej/J | $8.15 \times 10^3$    |
| 7      | Wood            | $3.42962 \times 10^{-9}$ | $1.04 \times 10^4$    | sej/J | $3.57 \times 10^1$    |
| 8      | Hydro           | $7.16451 \times 10^{-3}$ | $1.35 \times 10^5$    | sej/J | $9.65 \times 10^8$    |
| 9      | Nuclear         | $2.35634 \times 10^{-1}$ | $3.14 \times 10^5$    | sej/J | $7.40 \times 10^{10}$ |
| 10     | Sulphur         | $3.67174 \times 10^{-7}$ | $2.08 \times 10^{10}$ | sej/g | $8.34 \times 10^5$    |
| 11     | Biomass (solid) | $1.77383 \times 10^{-2}$ | $6.75 \times 10^4$    | sej/J | $1.20 \times 10^9$    |
| 12     | Hydrogen        | $6.46788 \times 10^{-8}$ | $1.15 \times 10^5$    | sej/J | $7.44 \times 10^3$    |
| 13     | Geothermal      | $2.07140 \times 10^{-4}$ | $4.52 \times 10^5$    | sej/J | $9.36 \times 10^7$    |
| 14     | Solar           | $8.07139 \times 10^{-7}$ | $7.93 \times 10^4$    | sej/J | $6.40 \times 10^4$    |
| 15     | Wave/tidal      | $9.06689 \times 10^{-6}$ | $2.83 \times 10^4$    | sej/J | $2.57 \times 10^5$    |
| 16     | Wind            | $8.28011 \times 10^{-4}$ | $9.90 \times 10^4$    | sej/J | $8.19 \times 10^7$    |
| 17     | Air             | $8.64305 \times 10^{-1}$ | $8.67 \times 10^7$    | sej/g | $7.49 \times 10^4$    |
| 18     | Barytes         | $6.14101 \times 10^{-3}$ | $1.68 \times 10^9$    | sej/g | $1.03 \times 10^4$    |
| 19     | Bauxite         | $4.22667 \times 10^{-2}$ | $1.44 \times 10^9$    | sej/g | $6.07 \times 10^4$    |

|    |                          |                           |                       |                      |                                         |
|----|--------------------------|---------------------------|-----------------------|----------------------|-----------------------------------------|
| 20 | Bentonite                | $7.72508 \times 10^{-3}$  | $4.80 \times 10^9$    | sej/g                | $3.71 \times 10^4$                      |
| 21 | Calcium sulphate (CaSO4) | $5.73354 \times 10^{-5}$  | $1.68 \times 10^9$    | sej/g                | $9.63 \times 10^1$                      |
| 22 | Chalk (CaCO3)            | $1.15015 \times 10^{-28}$ | $1.13 \times 10^7$    | sej/g                | $1.29 \times 10^{-24}$                  |
| 23 | Clay                     | $1.03371 \times 10^{-5}$  | $4.80 \times 10^9$    | sej/g                | $4.97 \times 10^1$                      |
| 24 | Chromium (Cr)            | $1.59875 \times 10^{-7}$  | $1.50 \times 10^{11}$ | sej/g                | $2.40 \times 10^1$                      |
| 25 | Copper (Cu)              | $4.31596 \times 10^{-6}$  | $9.80 \times 10^{10}$ | sej/g                | $4.23 \times 10^2$                      |
| 26 | Dolomite                 | $1.25596 \times 10^{-1}$  | $1.85 \times 10^{10}$ | sej/g                | $2.32 \times 10^6$                      |
| 27 | Iron (Fe)                | $1.02782 \times 10^1$     | $1.20 \times 10^{10}$ | sej/g                | $1.23 \times 10^8$                      |
| 28 | Feldspar                 | $2.17619 \times 10^{-33}$ | $1.68 \times 10^9$    | sej/g                | $3.66 \times 10^{-27}$                  |
| 29 | Ferromanganese           | $9.33562 \times 10^{-3}$  | $3.50 \times 10^{11}$ | sej/g                | $3.27 \times 10^6$                      |
| 30 | Fluorspar                | $7.62969 \times 10^{-4}$  | $8.36 \times 10^8$    | sej/g                | $6.38 \times 10^2$                      |
| 31 | Granite                  | $7.05437 \times 10^{-10}$ | $8.40 \times 10^8$    | sej/g                | $5.93 \times 10^{-4}$                   |
| 32 | Gravel                   | $3.79223 \times 10^{-2}$  | $8.40 \times 10^8$    | sej/g                | $3.19 \times 10^4$                      |
| 33 | Mercury (Hg)             | $9.91421 \times 10^{-8}$  | $4.20 \times 10^{13}$ | sej/g                | $4.16 \times 10^3$                      |
| 34 | Limestone                | $2.14853 \times 10^0$     | $1.68 \times 10^9$    | sej/g                | $3.61 \times 10^6$                      |
| 35 | N2                       | $7.91925 \times 10^{-1}$  | $1.17 \times 10^{10}$ | sej/g                | $9.24 \times 10^6$                      |
| 36 | Nickel (Ni)              | $6.89218 \times 10^{-11}$ | $2.00 \times 10^{11}$ | sej/g                | $1.38 \times 10^{-2}$                   |
| 37 | Oxygen (O2)              | $1.88417 \times 10^{-1}$  | $8.67 \times 10^7$    | sej/g                | $1.63 \times 10^4$                      |
| 38 | Olivine                  | $9.64269 \times 10^{-2}$  | $1.68 \times 10^9$    | sej/g                | $1.62 \times 10^5$                      |
| 39 | Lead (Pb)                | $7.90217 \times 10^{-2}$  | $4.80 \times 10^{11}$ | sej/g                | $3.79 \times 10^7$                      |
| 40 | Phosphate as P2O5        | $1.95631 \times 10^{-8}$  | $2.99 \times 10^{10}$ | sej/g                | $5.84 \times 10^{-1}$                   |
| 41 | Potassium chloride (KCl) | $3.19693 \times 10^{-4}$  | $4.97 \times 10^9$    | sej/g                | $1.59 \times 10^3$                      |
| 42 | Rutile                   | $1.65217 \times 10^{-28}$ | $1.68 \times 10^9$    | sej/g                | $2.78 \times 10^{-22}$                  |
| 43 | Sulphur                  | $3.98013 \times 10^{-2}$  | $2.08 \times 10^{10}$ | sej/g                | $8.29 \times 10^5$                      |
| 44 | Sand (SiO2)              | $1.93421 \times 10^{-4}$  | $1.68 \times 10^9$    | sej/g                | $3.25 \times 10^2$                      |
| 45 | Shale                    | $1.62365 \times 10^{-4}$  | $1.68 \times 10^9$    | sej/g                | $2.73 \times 10^2$                      |
| 46 | Sodium chloride (NaCl)   | $2.06419 \times 10^{-1}$  | $1.68 \times 10^9$    | sej/g                | $3.47 \times 10^5$                      |
| 47 | Talc                     | $6.41106 \times 10^{-23}$ | $2.80 \times 10^{10}$ | sej/g                | $1.79 \times 10^{-15}$                  |
| 48 | Zn                       | $2.88473 \times 10^{-3}$  | $7.20 \times 10^{10}$ | sej/g                | $2.08 \times 10^5$                      |
| 49 | Water-Public supply      | $1.83609 \times 10^2$     | $5.51 \times 10^5$    | sej/J                | $4.24 \times 10^5$                      |
| 50 | Water-River canal        | $4.94233 \times 10^{-1}$  | $3.41 \times 10^5$    | sej/g                | $1.69 \times 10^2$                      |
| 51 | Water-Sea                | $4.68154 \times 10^1$     | $5.36 \times 10^4$    | sej/J                | $1.05 \times 10^4$                      |
| 52 | Water-Well               | $4.82501 \times 10^{-2}$  | $6.89 \times 10^4$    | sej/J                | $1.39 \times 10^1$                      |
| 53 | Water-Unspecified        | $6.15159 \times 10^4$     | $3.06 \times 10^4$    | sej/J                | $7.87 \times 10^6$                      |
|    |                          |                           |                       | <b>Emergy sej/kg</b> | <b><math>4.52 \times 10^{12}</math></b> |
|    |                          |                           |                       | <b>UEV sej/g</b>     | <b><math>4.52 \times 10^9</math></b>    |

Table S4. LCI-based emergy required to produce 1 kg of pygas.

|    |                                                                | LCI - RAW DATA         |                       |       |                       |
|----|----------------------------------------------------------------|------------------------|-----------------------|-------|-----------------------|
|    | INPUTS                                                         | QUANTITY               | UEV                   | UNIT  | EMERGY                |
| 1  | Energy, gross calorific value, in biomass                      | $8.05 \times 10^{-2}$  | $6.75 \times 10^4$    | seJ/J | $5.44 \times 10^9$    |
| 3  | Peat, in ground                                                | $1.98 \times 10^{-6}$  | $3.19 \times 10^4$    | seJ/J | $6.17 \times 10^5$    |
| 4  | Wood, primary forest, standing                                 | $9.45 \times 10^{-7}$  | $1.04 \times 10^4$    | seJ/J | $1.11 \times 10^8$    |
| 5  | Carbon dioxide, in air                                         | $2.14 \times 10^{-2}$  | $8.87 \times 10^7$    | sej/g | $2.51 \times 10^6$    |
| 6  | Energy, kinetic (in wind), converted                           | $2.53 \times 10^{-2}$  | $9.90 \times 10^4$    | seJ/J | $2.51 \times 10^9$    |
| 7  | Energy, solar, converted                                       | $2.20 \times 10^{-3}$  | $7.93 \times 10^4$    | seJ/J | $1.74 \times 10^8$    |
| 8  | Energy, potential (in hydropower reservoir), converted         | $9.83 \times 10^{-2}$  | $1.35 \times 10^5$    | seJ/J | $1.32 \times 10^{10}$ |
| 9  | Aluminium, 24% in bauxite, 11% in crude ore, in ground         | $1.43 \times 10^{-5}$  | $5.40 \times 10^9$    | seJ/g | $7.70 \times 10^7$    |
| 10 | Anhydrite, in ground                                           | $7.27 \times 10^{-10}$ | $1.68 \times 10^9$    | seJ/g | $1.22 \times 10^4$    |
| 11 | Barite, 15% in crude ore, in ground                            | $1.13 \times 10^{-6}$  | $1.68 \times 10^9$    | seJ/g | $1.89 \times 10^6$    |
| 12 | Basalt, in ground                                              | $1.70 \times 10^{-11}$ | $7.56 \times 10^9$    | seJ/g | $1.29 \times 10^2$    |
| 13 | Borax, in ground                                               | $1.45 \times 10^{-10}$ | $1.68 \times 10^9$    | seJ/g | $2.43 \times 10^2$    |
| 14 | Cadmium, 0.30% in sulfide, Cd 0.18%, Pb, Zn, Ag, In, in ground | $7.03 \times 10^{-13}$ | $3.40 \times 10^{13}$ | seJ/g | $2.39 \times 10^4$    |
| 15 | Calcite, in ground                                             | $1.32 \times 10^{-3}$  | $1.68 \times 10^9$    | seJ/g | $2.22 \times 10^9$    |
| 16 | Carbon, in organic matter, in soil                             | $8.86 \times 10^{-9}$  | $2.77 \times 10^9$    | seJ/g | $2.45 \times 10^4$    |
| 17 | Cerium, 24% in bastnasite, 2.4% in crude ore, in ground        | $1.46 \times 10^{-7}$  | $1.14 \times 10^{10}$ | seJ/g | $1.66 \times 10^6$    |
| 18 | Chromium, 25.5% in chromite, 11.6% in crude ore, in ground     | $2.14 \times 10^{-7}$  | $1.50 \times 10^{11}$ | seJ/g | $3.21 \times 10^7$    |
| 19 | Chrysotile, in ground                                          | $1.23 \times 10^{-8}$  | $1.68 \times 10^9$    | seJ/g | $2.07 \times 10^4$    |
| 20 | Cinnabar, in ground                                            | $1.15 \times 10^{-9}$  | $1.68 \times 10^9$    | seJ/g | $1.93 \times 10^4$    |

|    |                                                                                               |                        |                       |       |                              |
|----|-----------------------------------------------------------------------------------------------|------------------------|-----------------------|-------|------------------------------|
| 21 | Clay, unspecified, in ground                                                                  | $5.59 \times 10^{-6}$  | $4.80 \times 10^9$    | seJ/g | $2.68 \times 10^7$           |
| 22 | Coal                                                                                          | $3.40 \times 10^{-1}$  | $5.71 \times 10^4$    | seJ/J | $1.94 \times 10^{10}$        |
| 23 | Cobalt, in ground                                                                             | $3.06 \times 10^{-7}$  | $1.30 \times 10^{11}$ | seJ/g | $3.98 \times 10^7$           |
| 24 | Colemanite, in ground                                                                         | $4.14 \times 10^{-9}$  | $1.68 \times 10^9$    | seJ/g | $6.96 \times 10^4$           |
| 25 | Copper, in ground                                                                             | $6.10 \times 10^{-8}$  | $9.80 \times 10^{10}$ | seJ/g | $5.98 \times 10^6$           |
| 26 | Diatomite, in ground                                                                          | $1.83 \times 10^{-13}$ | $1.68 \times 10^9$    | seJ/g | $3.07 \times 10^{-1}$        |
| 27 | Dolomite, in ground                                                                           | $8.61 \times 10^{-9}$  | $1.85 \times 10^{10}$ | seJ/g | $1.59 \times 10^5$           |
| 28 | Energy, geothermal, converted                                                                 | $4.41 \times 10^{-4}$  | $4.52 \times 10^5$    | seJ/J | $1.99 \times 10^8$           |
| 29 | Europium, 0.06% in bastnasite, 0.006% in crude ore, in ground                                 | $3.65 \times 10^{-10}$ | $1.68 \times 10^9$    | seJ/g | $6.13 \times 10^2$           |
| 30 | Feldspar, in ground                                                                           | $1.78 \times 10^{-15}$ | $1.68 \times 10^9$    | seJ/g | $2.99 \times 10^{-3}$        |
| 31 | Fluorine, in ground                                                                           | $9.40 \times 10^{-7}$  | $1.68 \times 10^9$    | seJ/g | $1.58 \times 10^6$           |
| 32 | Fluorspar, 92%, in ground                                                                     | $1.93 \times 10^{-5}$  | $8.38 \times 10^8$    | seJ/g | $1.62 \times 10^7$           |
| 33 | Gadolinium, 0.15% in bastnasite, 0.015% in crude ore, in ground                               | $9.11 \times 10^{-10}$ | $1.68 \times 10^9$    | seJ/g | $1.53 \times 10^4$           |
| 34 | Gas, natural, in ground                                                                       | $1.11 \times 10^1$     | $6.83 \times 10^4$    | seJ/J | $7.58 \times 10^{11}$        |
| 35 | Gold, in ground                                                                               | $2.17 \times 10^{-17}$ | $5.00 \times 10^{11}$ | seJ/g | $1.08 \times 10^{-2}$        |
| 36 | Granite, in ground                                                                            | $1.53 \times 10^{-15}$ | $8.40 \times 10^8$    | seJ/g | $1.29 \times 10^{-3}$        |
| 37 | Gravel, in ground                                                                             | $5.88 \times 10^{-5}$  | $8.40 \times 10^8$    | seJ/g | $4.94 \times 10^7$           |
| 38 | Gypsum, in ground                                                                             | $2.37 \times 10^{-8}$  | $2.85 \times 10^9$    | seJ/g | 6.75E+4                      |
| 39 | Indium, 0.005% in sulfide, In 0.003%, Pb, Zn, Ag, Cd, in ground                               | $1.03 \times 10^{-14}$ | $4.03 \times 10^{11}$ | seJ/g | $4.16 \times 10^{\text{na}}$ |
| 40 | Iron, 46% in ore, 25% in crude ore, in ground                                                 | $3.75 \times 10^{-6}$  | $1.20 \times 10^{10}$ | seJ/g | $4.49 \times 10^7$           |
| 41 | Kaolinite, 24% in crude ore, in ground                                                        | $3.30 \times 10^{-6}$  | $1.68 \times 10^9$    | seJ/g | $5.54 \times 10^6$           |
| 42 | Kieserite, 25% in crude ore, in ground                                                        | $1.16 \times 10^{-10}$ | $1.68 \times 10^9$    | seJ/g | $1.94 \times 10^2$           |
| 43 | Lanthanum, 7.2% in bastnasite, 0.72% in crude ore, in ground                                  | $4.37 \times 10^{-8}$  | $1.68 \times 10^9$    | seJ/g | 7.33E+4                      |
| 44 | Lead, 5.0% in sulfide, Pb 3.0%, Zn, Ag, Cd, In, in ground                                     | $2.30 \times 10^{-11}$ | $4.80 \times 10^{11}$ | seJ/g | 1.10E+4                      |
| 45 | Lithium, 0.15% in brine, in ground                                                            | $2.66 \times 10^{-14}$ | $9.27 \times 10^{11}$ | seJ/g | $2.47 \times 10^1$           |
| 46 | Magnesite, 60% in crude ore, in ground                                                        | $1.09 \times 10^{-8}$  | $1.68 \times 10^9$    | seJ/g | 1.83E+4                      |
| 47 | Manganese, 35.7% in sedimentary deposit, 14.2% in crude ore, in ground                        | $1.02 \times 10^{-9}$  | $3.50 \times 10^{11}$ | seJ/g | $3.58 \times 10^5$           |
| 48 | Metamorphous rock, graphite containing, in ground                                             | $2.70 \times 10^{-8}$  | $1.68 \times 10^9$    | seJ/g | 4.52E+4                      |
| 49 | Molybdenum, 0.025% in sulfide, Mo 8.2 $\times 10^{-3}$ % and Cu 0.39% in crude ore, in ground | $6.01 \times 10^{-7}$  | $7.00 \times 10^{11}$ | seJ/g | $4.21 \times 10^8$           |
| 50 | Neodymium, 4% in bastnasite, 0.4% in crude ore, in ground                                     | $2.40 \times 10^{-8}$  | $1.68 \times 10^9$    | seJ/g | 4.03E+4                      |
| 51 | Nickel, 1.13% in sulfide, Ni 0.76% and Cu 0.76% in crude ore, in ground                       | $7.94 \times 10^{-7}$  | $2.00 \times 10^{11}$ | seJ/g | $1.59 \times 10^8$           |
| 52 | Oil, crude, in ground                                                                         | $5.25 \times 10^1$     | $9.45 \times 10^4$    | seJ/J | $4.96 \times 10^{12}$        |
| 53 | Olivine, in ground                                                                            | $2.49 \times 10^{-10}$ | $1.68 \times 10^9$    | seJ/g | $4.18 \times 10^2$           |
| 54 | Pd, in ground                                                                                 | $1.27 \times 10^{-10}$ | $1.20 \times 10^{11}$ | seJ/g | 1.53E+4                      |
| 55 | Phosphorus, 18% in apatite, 12% in crude ore, in ground                                       | $3.76 \times 10^{-6}$  | $2.07 \times 10^{10}$ | seJ/g | $7.77 \times 10^7$           |
| 56 | Praseodymium, 0.42% in bastnasite, 0.042% in crude ore, in ground                             | $2.55 \times 10^{-9}$  | $1.68 \times 10^9$    | seJ/g | $4.28 \times 10^4$           |
| 57 | Pt, in ground                                                                                 | $3.94 \times 10^{-12}$ | $3.70 \times 10^{11}$ | seJ/g | $1.46 \times 10^4$           |
| 58 | Rh, in ground                                                                                 | $3.53 \times 10^{-12}$ | $1.20 \times 10^{12}$ | seJ/g | $4.24 \times 10^4$           |
| 59 | Rhenium, in crude ore, in ground                                                              | $1.05 \times 10^{-12}$ | $8.93 \times 10^{12}$ | seJ/g | $9.40 \times 10^4$           |
| 60 | Samarium, 0.3% in bastnasite, 0.03% in crude ore, in ground                                   | $1.82 \times 10^{-9}$  | $1.68 \times 10^9$    | seJ/g | $3.05 \times 10^4$           |
| 61 | Sand, unspecified, in ground                                                                  | $1.39 \times 10^{-8}$  | $1.68 \times 10^9$    | seJ/g | 2.34E+4                      |
| 62 | Shale, in ground                                                                              | $2.06 \times 10^{-9}$  | $1.68 \times 10^9$    | seJ/g | $3.46 \times 10^4$           |
| 63 | Silver, in ground                                                                             | $5.88 \times 10^{-17}$ | $4.50 \times 10^{11}$ | seJ/g | $2.65 \times 10^{-2}$        |
| 64 | Sodium chloride, in ground                                                                    | $5.96 \times 10^{-4}$  | $1.68 \times 10^9$    | seJ/g | $1.00 \times 10^9$           |
| 65 | Sodium nitrate, in ground                                                                     | $7.71 \times 10^{-15}$ | $1.68 \times 10^9$    | seJ/g | $1.29 \times 10^{-2}$        |
| 66 | Sodium sulphate, various forms, in ground                                                     | $5.48 \times 10^{-6}$  | $1.40 \times 10^9$    | seJ/g | $7.65 \times 10^6$           |
| 67 | Stibnite, in ground                                                                           | $1.90 \times 10^{-14}$ | $1.68 \times 10^9$    | seJ/g | $3.19 \times 10^{-2}$        |
| 68 | Sulfur, in ground                                                                             | $4.28 \times 10^{-6}$  | $2.08 \times 10^{10}$ | seJ/g | $8.92 \times 10^7$           |
| 69 | Sylvite, 25 % in sylvinitite, in ground                                                       | $7.20 \times 10^{-9}$  | $1.68 \times 10^9$    | seJ/g | 1.21E+4                      |
| 70 | Talc, in ground                                                                               | $3.28 \times 10^{-9}$  | $2.80 \times 10^{10}$ | seJ/g | 9.19E+4                      |
| 71 | Tantalum, 81.9% in tantalite, $1.6 \times 10^{-4}$ % in crude ore, in ground                  | $2.14 \times 10^{-17}$ | $1.70 \times 10^{11}$ | seJ/g | $3.64 \times 10^{-3}$        |
| 72 | Tellurium, 0.5ppm in sulfide, Te 0.2ppm, Cu and Ag, in crude ore, in ground                   | $2.86 \times 10^{-18}$ | $5.04 \times 10^{13}$ | seJ/g | $1.44 \times 10^{-1}$        |
| 73 | Tin, 79% in cassiterite, 0.1% in crude ore, in ground                                         | $2.57 \times 10^{-10}$ | $1.70 \times 10^{12}$ | seJ/g | $4.37 \times 10^5$           |

|    |                                                                  |                        |                       |                      |                                         |
|----|------------------------------------------------------------------|------------------------|-----------------------|----------------------|-----------------------------------------|
| 74 | TiO <sub>2</sub> , 54% in ilmenite, 2.6% in crude ore, in ground | $1.07 \times 10^{-5}$  | $3.82 \times 10^{10}$ | seJ/g                | $4.10 \times 10^8$                      |
| 75 | Ulexite, in ground                                               | $1.09 \times 10^{-17}$ | $1.68 \times 10^9$    | seJ/g                | $1.83 \times 10^{-5}$                   |
| 76 | Uranium, in ground                                               | $1.10 \times 10^{-6}$  | $1.60 \times 10^{11}$ | seJ/g                | $1.76 \times 10^8$                      |
| 77 | Zinc, 9.0% in sulfide, Zn 5.3%, Pb, Ag, Cd, In, in ground        | $4.57 \times 10^{-8}$  | $7.20 \times 10^{10}$ | seJ/g                | $3.29 \times 10^6$                      |
| 78 | Zirconium, 50% in zircon, 0.39% in crude ore, in ground          | $2.94 \times 10^{-17}$ | $3.18 \times 10^{10}$ | seJ/g                | $9.36 \times 10^{-4}$                   |
| 79 | Magnesium, 0.13% in water                                        | $3.37 \times 10^{-18}$ | $1.68 \times 10^9$    | seJ/g                | $5.67 \times 10^{-6}$                   |
| 80 | Water, cooling, unspecified natural origin                       | $9.60 \times 10^{-3}$  | $2.70 \times 10^5$    | seJ/g                | $2.60 \times 10^9$                      |
| 81 | Water, lake                                                      | $7.77 \times 10^{-7}$  | $4.52 \times 10^5$    | seJ/g                | $3.51 \times 10^5$                      |
| 82 | Water, process, unspecified natural origin                       | $5.89 \times 10^{-4}$  | $6.74 \times 10^4$    | seJ/J                | $1.66 \times 10^8$                      |
| 83 | Water, river                                                     | $2.58 \times 10^{-4}$  | $3.41 \times 10^5$    | seJ/g                | $8.78 \times 10^7$                      |
| 84 | Water, salt, ocean                                               | $4.81 \times 10^{-4}$  | $5.36 \times 10^4$    | seJ/J                | $1.08 \times 10^8$                      |
| 85 | Water, salt, sole                                                | $9.15 \times 10^{-4}$  | $5.36 \times 10^4$    | seJ/J                | $2.05 \times 10^8$                      |
| 86 | Water, unspecified natural origin                                | $2.23 \times 10^{-3}$  | $3.06 \times 10^4$    | seJ/J                | $2.86 \times 10^8$                      |
| 87 | Water, well, in ground                                           | $1.14 \times 10^{-4}$  | $6.89 \times 10^4$    | seJ/J                | $3.28 \times 10^7$                      |
|    |                                                                  |                        |                       | <b>Energy sej/kg</b> | <b><math>5.77 \times 10^{12}</math></b> |
|    |                                                                  |                        |                       | <b>UEV sej/g</b>     | <b><math>5.77 \times 10^9</math></b>    |

Table S5. LCI-based emergy required to produce 1 kg of xylene.

|   |                                                                |                        |                       |       |                       |
|---|----------------------------------------------------------------|------------------------|-----------------------|-------|-----------------------|
| 1 | Energy, gross calorific value, in biomass                      | $2.53 \times 10^{-2}$  | $6.75 \times 10^4$    | seJ/J | $1.71 \times 10^9$    |
| 3 | Peat, in ground                                                | $5.24 \times 10^{-7}$  | $3.19 \times 10^4$    | seJ/J | $1.63 \times 10^5$    |
| 4 | Wood, primary forest, standing                                 | $8.63 \times 10^{-7}$  | $1.04 \times 10^4$    | seJ/J | $1.01 \times 10^8$    |
| 5 | Carbon dioxide, in air                                         | $3.79 \times 10^{-3}$  | $8.87 \times 10^7$    | seJ/g | $9.74 \times 10^5$    |
| 6 | Energy, kinetic (in wind), converted                           | $9.85 \times 10^{-3}$  | $9.90 \times 10^4$    | seJ/J | $9.74 \times 10^8$    |
| 7 | Energy, solar, converted                                       | $5.70 \times 10^{-4}$  | $7.93 \times 10^4$    | seJ/J | $4.52 \times 10^7$    |
| 8 | Energy, potential (in hydropower reservoir), converted         | $4.69 \times 10^{-2}$  | $1.35 \times 10^5$    | seJ/J | $6.32 \times 10^9$    |
| 9 | Aluminium, 24% in bauxite, 11% in crude ore, in ground         | $1.69 \times 10^{-5}$  | $5.40 \times 10^9$    | seJ/g | $9.14 \times 10^7$    |
| 1 | Anhydrite, in ground                                           | $7.29 \times 10^{-10}$ | $1.68 \times 10^9$    | seJ/g | $1.22 \times 10^3$    |
| 1 | Barite, 15% in crude ore, in ground                            | $1.21 \times 10^{-6}$  | $1.68 \times 10^9$    | seJ/g | $2.03 \times 10^6$    |
| 1 | Basalt, in ground                                              | $1.64 \times 10^{-11}$ | $7.56 \times 10^9$    | seJ/g | $1.24 \times 10^2$    |
| 1 | Borax, in ground                                               | $1.37 \times 10^{-10}$ | $1.68 \times 10^9$    | seJ/g | $2.30 \times 10^2$    |
| 3 | Cadmium, 0.30% in sulfide, Cd 0.18%, Pb, Zn, Ag, In, in ground | $7.85 \times 10^{-13}$ | $3.40 \times 10^{13}$ | seJ/g | $2.67 \times 10^4$    |
| 1 | Calcite, in ground                                             | $1.25 \times 10^{-3}$  | $1.68 \times 10^9$    | seJ/g | $2.10 \times 10^9$    |
| 1 | Carbon, in organic matter, in soil                             | $8.49 \times 10^{-9}$  | $2.77 \times 10^9$    | seJ/g | $2.35 \times 10^4$    |
| 7 | Cerium, 24% in bastnasite, 2.4% in crude ore, in ground        | $1.80 \times 10^{-7}$  | $1.14 \times 10^{10}$ | seJ/g | $2.05 \times 10^6$    |
| 1 | Chromium, 25.5% in chromite, 11.6% in crude ore, in ground     | $2.07 \times 10^{-7}$  | $1.50 \times 10^{11}$ | seJ/g | $3.10 \times 10^7$    |
| 9 | Chrysotile, in ground                                          | $1.33 \times 10^{-8}$  | $1.68 \times 10^9$    | seJ/g | $2.23 \times 10^4$    |
| 2 | Cinnabar, in ground                                            | $1.23 \times 10^{-9}$  | $1.68 \times 10^9$    | seJ/g | $2.07 \times 10^3$    |
| 1 | Clay, unspecified, in ground                                   | $5.43 \times 10^{-6}$  | $4.80 \times 10^9$    | seJ/g | $2.61 \times 10^7$    |
| 2 | Coal                                                           | $1.80 \times 10^{-1}$  | $5.71 \times 10^4$    | seJ/J | $1.03 \times 10^{10}$ |
| 2 | Cobalt, in ground                                              | $3.78 \times 10^{-7}$  | $1.30 \times 10^{11}$ | seJ/g | $4.91 \times 10^7$    |
| 4 | Colemanite, in ground                                          | $3.92 \times 10^{-9}$  | $1.68 \times 10^9$    | seJ/g | $6.58 \times 10^3$    |
| 2 | Copper, in ground                                              | $1.88 \times 10^{-8}$  | $9.80 \times 10^{10}$ | seJ/g | $1.84 \times 10^6$    |
| 6 | Diatomite, in ground                                           | $1.73 \times 10^{-13}$ | $1.68 \times 10^9$    | seJ/g | $2.90 \times 10^{-1}$ |
| 7 | Dolomite, in ground                                            | $7.04 \times 10^{-9}$  | $1.85 \times 10^{10}$ | seJ/g | $1.30 \times 10^5$    |
| 2 | Energy, geothermal, converted                                  | $1.04 \times 10^{-4}$  | $4.52 \times 10^5$    | seJ/J | $4.71 \times 10^7$    |

|   |                                                                                               |                        |                       |           |                       |
|---|-----------------------------------------------------------------------------------------------|------------------------|-----------------------|-----------|-----------------------|
| 2 |                                                                                               | $4.51 \times 10^{-10}$ | $1.68 \times 10^9$    | sel/<br>g | $7.57 \times 10^2$    |
| 9 | Europium, 0.06% in bastnasite, 0.006% in crude ore, in ground                                 |                        |                       |           |                       |
| 3 |                                                                                               | $1.71 \times 10^{-15}$ | $1.68 \times 10^9$    | sel/<br>g | $2.88 \times 10^{-3}$ |
| 0 | Feldspar, in ground                                                                           |                        |                       |           |                       |
| 3 |                                                                                               |                        |                       | sel/<br>g |                       |
| 1 | Fluorine, in ground                                                                           | $8.70 \times 10^{-7}$  | $1.68 \times 10^9$    | g         | $1.46 \times 10^6$    |
| 3 |                                                                                               |                        |                       | sel/<br>g |                       |
| 2 | Fluorspar, 92%, in ground                                                                     | $1.79 \times 10^{-5}$  | $8.38 \times 10^8$    | g         | $1.50 \times 10^7$    |
| 3 |                                                                                               |                        |                       | sel/<br>g |                       |
| 3 | Gadolinium, 0.15% in bastnasite, 0.015% in crude ore, in ground                               | $1.12 \times 10^{-9}$  | $1.68 \times 10^9$    | g         | $1.89 \times 10^3$    |
| 3 |                                                                                               |                        |                       |           | $3.43 \times 10^{11}$ |
| 4 | Gas, natural, in ground                                                                       | $5.03 \times 10^0$     | $6.83 \times 10^4$    | sel/J     |                       |
| 3 |                                                                                               | $2.05 \times 10^{-17}$ | $5.00 \times 10^{11}$ | sel/<br>g | $1.03 \times 10^{-2}$ |
| 5 | Gold, in ground                                                                               |                        |                       |           |                       |
| 3 |                                                                                               | $1.48 \times 10^{-15}$ | $8.40 \times 10^8$    | sel/<br>g | $1.24 \times 10^{-3}$ |
| 6 | Granite, in ground                                                                            |                        |                       |           |                       |
| 3 |                                                                                               |                        |                       | sel/<br>g |                       |
| 7 | Gravel, in ground                                                                             | $6.51 \times 10^{-5}$  | $8.40 \times 10^8$    | g         | $5.47 \times 10^7$    |
| 3 |                                                                                               |                        |                       | sel/<br>g |                       |
| 8 | Gypsum, in ground                                                                             | $1.76 \times 10^{-8}$  | $2.85 \times 10^9$    | g         | $5.02 \times 10^4$    |
| 3 |                                                                                               | $1.16 \times 10^{-14}$ | $4.03 \times 10^{11}$ | sel/<br>g |                       |
| 9 | Indium, 0.005% in sulfide, In 0.003%, Pb, Zn, Ag, Cd, in ground                               |                        |                       |           | $4.69 \times 10^0$    |
| 4 |                                                                                               |                        | $1.20 \times 10^{10}$ | sel/<br>g |                       |
| 0 | Iron, 46% in ore, 25% in crude ore, in ground                                                 | $2.44 \times 10^{-6}$  |                       | g         | $2.93 \times 10^7$    |
| 4 |                                                                                               |                        |                       | sel/<br>g |                       |
| 1 | Kaolinite, 24% in crude ore, in ground                                                        | $4.06 \times 10^{-6}$  | $1.68 \times 10^9$    | g         | $6.83 \times 10^6$    |
| 4 |                                                                                               | $1.11 \times 10^{-10}$ |                       | sel/<br>g |                       |
| 2 | Kieserite, 25% in crude ore, in ground                                                        |                        | $1.68 \times 10^9$    | g         | $1.86 \times 10^2$    |
| 4 |                                                                                               |                        |                       | sel/<br>g |                       |
| 3 | Lanthanum, 7.2% in bastnasite, 0.72% in crude ore, in ground                                  | $5.39 \times 10^{-8}$  | $1.68 \times 10^9$    | g         | $9.06 \times 10^4$    |
| 4 |                                                                                               | $2.24 \times 10^{-11}$ | $4.80 \times 10^{11}$ | sel/<br>g |                       |
| 4 | Lead, 5.0% in sulfide, Pb 3.0%, Zn, Ag, Cd, In, in ground                                     |                        |                       |           | $1.07 \times 10^4$    |
| 4 |                                                                                               | $2.58 \times 10^{-14}$ | $9.27 \times 10^{11}$ | sel/<br>g |                       |
| 5 | Lithium, 0.15% in brine, in ground                                                            |                        |                       |           | $2.39 \times 10^1$    |
| 4 |                                                                                               |                        |                       | sel/<br>g |                       |
| 6 | Magnesite, 60% in crude ore, in ground                                                        | $1.06 \times 10^{-8}$  | $1.68 \times 10^9$    | g         | $1.79 \times 10^4$    |
| 4 |                                                                                               | $9.70 \times 10^{-10}$ | $3.50 \times 10^{11}$ | sel/<br>g |                       |
| 7 | Manganese, 35.7% in sedimentary deposit, 14.2% in crude ore, in ground                        |                        |                       |           | $3.40 \times 10^5$    |
| 4 |                                                                                               |                        |                       | sel/<br>g |                       |
| 8 | Metamorphous rock, graphite containing, in ground                                             | $3.32 \times 10^{-8}$  | $1.68 \times 10^9$    | g         | $5.56 \times 10^4$    |
| 4 | Molybdenum, 0.025% in sulfide, Mo $8.2 \times 10^{-3}\%$ and Cu 0.39% in crude ore, in ground |                        | $7.00 \times 10^{11}$ | sel/<br>g |                       |
| 9 |                                                                                               | $7.18 \times 10^{-7}$  |                       |           | $5.02 \times 10^8$    |
| 5 |                                                                                               |                        |                       | sel/<br>g |                       |
| 0 | Neodymium, 4% in bastnasite, 0.4% in crude ore, in ground                                     | $2.97 \times 10^{-8}$  | $1.68 \times 10^9$    | g         | $4.98 \times 10^4$    |
| 5 |                                                                                               |                        | $2.00 \times 10^{11}$ | sel/<br>g |                       |
| 1 | Nickel, 1.13% in sulfide, Ni 0.76% and Cu 0.76% in crude ore, in ground                       | $8.43 \times 10^{-7}$  |                       |           | $1.69 \times 10^8$    |
| 5 |                                                                                               |                        |                       |           | $4.87 \times 10^{12}$ |
| 2 | Oil, crude, in ground                                                                         | $5.15 \times 10^1$     | $9.45 \times 10^4$    | sel/J     |                       |
| 5 |                                                                                               | $2.48 \times 10^{-10}$ |                       | sel/<br>g |                       |
| 3 | Olivine, in ground                                                                            |                        | $1.68 \times 10^9$    | g         | $4.17 \times 10^2$    |
| 5 |                                                                                               | $1.22 \times 10^{-10}$ | $1.20 \times 10^{11}$ | sel/<br>g |                       |
| 4 | Pd, in ground                                                                                 |                        |                       |           | $1.46 \times 10^4$    |
| 5 |                                                                                               |                        | $2.07 \times 10^{10}$ | sel/<br>g |                       |
| 5 | Phosphorus, 18% in apatite, 12% in crude ore, in ground                                       | $3.48 \times 10^{-6}$  |                       | g         | $7.19 \times 10^7$    |
| 5 |                                                                                               |                        |                       | sel/<br>g |                       |
| 6 | Praseodymium, 0.42% in bastnasite, 0.042% in crude ore, in ground                             | $3.15 \times 10^{-9}$  | $1.68 \times 10^9$    | g         | $5.29 \times 10^3$    |
| 5 |                                                                                               | $3.78 \times 10^{-12}$ | $3.70 \times 10^{11}$ | sel/<br>g |                       |
| 7 | Pt, in ground                                                                                 |                        |                       |           | $1.40 \times 10^3$    |
| 5 |                                                                                               | $3.39 \times 10^{-12}$ | $1.20 \times 10^{12}$ | sel/<br>g |                       |
| 8 | Rh, in ground                                                                                 |                        |                       |           | $4.07 \times 10^3$    |
| 5 |                                                                                               | $1.01 \times 10^{-12}$ | $8.93 \times 10^{12}$ | sel/<br>g |                       |
| 9 | Rhenium, in crude ore, in ground                                                              |                        |                       |           | $9.01 \times 10^3$    |
| 6 |                                                                                               |                        |                       | sel/<br>g |                       |
| 0 | Samarium, 0.3% in bastnasite, 0.03% in crude ore, in ground                                   | $2.25 \times 10^{-9}$  | $1.68 \times 10^9$    | g         | $3.77 \times 10^3$    |
| 6 |                                                                                               |                        |                       | sel/<br>g |                       |
| 1 | Sand, unspecified, in ground                                                                  | $1.21 \times 10^{-8}$  | $1.68 \times 10^9$    | g         | $2.03 \times 10^4$    |
| 6 |                                                                                               |                        |                       | sel/<br>g |                       |
| 2 | Shale, in ground                                                                              | $2.06 \times 10^{-9}$  | $1.68 \times 10^9$    | g         | $3.47 \times 10^3$    |
| 6 |                                                                                               | $5.57 \times 10^{-17}$ | $4.50 \times 10^{11}$ | sel/<br>g | $2.51 \times 10^{-2}$ |
| 3 | Silver, in ground                                                                             |                        |                       |           |                       |

|   |                                                                              |                        |                       |                |                                         |
|---|------------------------------------------------------------------------------|------------------------|-----------------------|----------------|-----------------------------------------|
| 6 |                                                                              |                        |                       | seJ/           |                                         |
| 4 | Sodium chloride, in ground                                                   | $8.11 \times 10^{-4}$  | $1.68 \times 10^9$    | g              | $1.36 \times 10^9$                      |
| 6 |                                                                              | $6.98 \times 10^{-15}$ |                       | seJ/           | $1.17 \times 10^{-2}$                   |
| 5 | Sodium nitrate, in ground                                                    |                        | $1.68 \times 10^9$    | g              |                                         |
| 6 |                                                                              |                        |                       | seJ/           |                                         |
| 6 | Sodium sulphate, various forms, in ground                                    | $5.07 \times 10^{-6}$  | $1.40 \times 10^9$    | g              | $7.07 \times 10^6$                      |
| 6 |                                                                              | $1.80 \times 10^{-14}$ |                       | seJ/           | $3.02 \times 10^{-2}$                   |
| 7 | Stibnite, in ground                                                          |                        | $1.68 \times 10^9$    | g              |                                         |
| 6 |                                                                              |                        | $2.08 \times 10^{10}$ | seJ/           |                                         |
| 8 | Sulfur, in ground                                                            | $1.01 \times 10^{-6}$  |                       | g              | $2.11 \times 10^7$                      |
| 6 |                                                                              |                        |                       | seJ/           |                                         |
| 9 | Sylvite, 25 % in sylvinit, in ground                                         | $6.88 \times 10^{-9}$  | $1.68 \times 10^9$    | g              | $1.16 \times 10^4$                      |
| 7 |                                                                              |                        | $2.80 \times 10^{10}$ | seJ/           |                                         |
| 0 | Talc, in ground                                                              | $3.20 \times 10^{-9}$  |                       | g              | $8.95 \times 10^4$                      |
| 7 |                                                                              | $2.03 \times 10^{-17}$ | $1.70 \times 10^{11}$ | seJ/           | $3.44 \times 10^{-3}$                   |
| 1 | Tantalum, 81.9% in tantalite, $1.6 \times 10^{-4}\%$ in crude ore, in ground |                        |                       | g              |                                         |
| 7 |                                                                              | $2.70 \times 10^{-18}$ | $5.04 \times 10^{13}$ | seJ/           | $1.36 \times 10^{-1}$                   |
| 2 | Tellurium, 0.5ppm in sulfide, Te 0.2ppm, Cu and Ag, in crude ore, in ground  |                        |                       | g              |                                         |
| 7 |                                                                              | $3.17 \times 10^{-10}$ | $1.70 \times 10^{12}$ | seJ/           | $5.39 \times 10^5$                      |
| 3 | Tin, 79% in cassiterite, 0.1% in crude ore, in ground                        |                        |                       | g              |                                         |
| 7 |                                                                              |                        | $3.82 \times 10^{10}$ | seJ/           |                                         |
| 4 | TiO <sub>2</sub> , 54% in ilmenite, 2.6% in crude ore, in ground             | $9.92 \times 10^{-6}$  |                       | g              | $3.79 \times 10^8$                      |
| 7 |                                                                              | $1.03 \times 10^{-17}$ |                       | seJ/           | $1.73 \times 10^{-5}$                   |
| 5 | Ulexite, in ground                                                           |                        | $1.68 \times 10^9$    | g              |                                         |
| 7 |                                                                              |                        | $1.60 \times 10^{11}$ | seJ/           |                                         |
| 6 | Uranium, in ground                                                           | $6.34 \times 10^{-7}$  |                       | g              | $1.01 \times 10^8$                      |
| 7 |                                                                              |                        | $7.20 \times 10^{10}$ | seJ/           |                                         |
| 7 | Zinc, 9.0% in sulfide, Zn 5.3%, Pb, Ag, Cd, In, in ground                    | $1.57 \times 10^{-8}$  |                       | g              | $1.13 \times 10^6$                      |
| 7 |                                                                              | $2.79 \times 10^{-17}$ | $3.18 \times 10^{10}$ | seJ/           | $8.87 \times 10^{-4}$                   |
| 8 | Zirconium, 50% in zircon, 0.39% in crude ore, in ground                      |                        |                       | g              |                                         |
| 7 |                                                                              | $3.19 \times 10^{-18}$ |                       | seJ/           | $5.37 \times 10^{-6}$                   |
| 9 | Magnesium, 0.13% in water                                                    |                        | $1.68 \times 10^9$    | g              |                                         |
| 8 |                                                                              |                        |                       | seJ/           |                                         |
| 0 | Water, cooling, unspecified natural origin                                   | $8.34 \times 10^{-3}$  | $2.70 \times 10^5$    | g              | $2.26 \times 10^9$                      |
| 8 |                                                                              |                        |                       | seJ/           |                                         |
| 1 | Water, lake                                                                  | $5.89 \times 10^{-7}$  | $4.52 \times 10^5$    | g              | $2.66 \times 10^5$                      |
| 8 |                                                                              |                        |                       |                |                                         |
| 2 | Water, process, unspecified natural origin                                   | $8.80 \times 10^{-4}$  | $6.74 \times 10^4$    | seJ/J          | $2.48 \times 10^8$                      |
| 8 |                                                                              |                        |                       | seJ/           |                                         |
| 3 | Water, river                                                                 | $2.44 \times 10^{-4}$  | $3.41 \times 10^5$    | g              | $8.31 \times 10^7$                      |
| 8 |                                                                              |                        |                       |                |                                         |
| 4 | Water, salt, ocean                                                           | $6.52 \times 10^{-4}$  | $5.36 \times 10^4$    | seJ/J          | $1.46 \times 10^8$                      |
| 8 |                                                                              |                        |                       |                |                                         |
| 5 | Water, salt, sole                                                            | $8.98 \times 10^{-4}$  | $5.36 \times 10^4$    | seJ/J          | $2.01 \times 10^8$                      |
| 8 |                                                                              |                        |                       |                |                                         |
| 6 | Water, unspecified natural origin                                            | $2.19 \times 10^{-3}$  | $3.06 \times 10^4$    | seJ/J          | $2.81 \times 10^8$                      |
| 8 |                                                                              |                        |                       |                |                                         |
| 7 | Water, well, in ground                                                       | $6.65 \times 10^{-5}$  | $6.89 \times 10^4$    | seJ/J          | $1.92 \times 10^7$                      |
|   |                                                                              |                        |                       |                | <b><math>5.24 \times 10^{12}</math></b> |
|   |                                                                              |                        |                       | <b>Emergia</b> | <b>seJ</b>                              |
|   |                                                                              |                        |                       | <b>UEV</b>     | <b>g</b>                                |
|   |                                                                              |                        |                       |                | <b><math>5.24 \times 10^9</math></b>    |

Table S6. LCI-based emergy required to produce 1 kg of ethylene.

| INPUTS |                                                        | QUANTIDADE             | UEV                | UNIDAD E | EMERGIA               |
|--------|--------------------------------------------------------|------------------------|--------------------|----------|-----------------------|
| 1      | Energy, gross calorific value, in biomass              | $1.30 \times 10^{-1}$  | $6.75 \times 10^4$ | seJ/J    | $8.79 \times 10^9$    |
| 3      | Peat, in ground                                        | $2.19 \times 10^{-6}$  | $3.19 \times 10^4$ | seJ/J    | $6.83 \times 10^5$    |
| 4      | Wood, primary forest, standing                         | $1.05 \times 10^{-6}$  | $1.04 \times 10^4$ | seJ/J    | $1.23 \times 10^8$    |
| 5      | Carbon dioxide, in air                                 | $2.14 \times 10^{-2}$  | $8.87 \times 10^7$ | seJ/g    | $3.90 \times 10^6$    |
| 6      | Energy, kinetic (in wind), converted                   | $3.94 \times 10^{-2}$  | $9.90 \times 10^4$ | seJ/J    | $3.90 \times 10^9$    |
| 7      | Energy, solar, converted                               | $3.66 \times 10^{-3}$  | $7.93 \times 10^4$ | seJ/J    | $2.90 \times 10^8$    |
| 8      | Energy, potential (in hydropower reservoir), converted | $1.40 \times 10^{-1}$  | $1.35 \times 10^5$ | seJ/J    | $1.89 \times 10^{10}$ |
| 9      | Aluminium, 24% in bauxite, 11% in crude ore, in ground | $1.59 \times 10^{-5}$  | $5.40 \times 10^9$ | seJ/g    | $8.59 \times 10^7$    |
| 10     | Anhydrite, in ground                                   | $8.03 \times 10^{-10}$ | $1.68 \times 10^9$ | seJ/g    | $1.35 \times 10^3$    |
| 11     | Barite, 15% in crude ore, in ground                    | $1.60 \times 10^{-6}$  | $1.68 \times 10^9$ | seJ/g    | $2.68 \times 10^6$    |
| 12     | Basalt, in ground                                      | $1.89 \times 10^{-11}$ | $7.56 \times 10^9$ | seJ/g    | $1.43 \times 10^2$    |
| 13     | Borax, in ground                                       | $1.61 \times 10^{-10}$ | $1.68 \times 10^9$ | seJ/g    | $2.70 \times 10^2$    |

|    |                                                                                               |                        |                       |       |                       |
|----|-----------------------------------------------------------------------------------------------|------------------------|-----------------------|-------|-----------------------|
|    | Cadmium, 0.30% in sulfide, Cd 0.18%, Pb, Zn,                                                  |                        |                       |       |                       |
| 14 | Ag, In, in ground                                                                             | $8.17 \times 10^{-13}$ | $3.40 \times 10^{13}$ | sel/g | $2.78 \times 10^4$    |
| 15 | Calcite, in ground                                                                            | $1.85 \times 10^{-3}$  | $1.68 \times 10^9$    | sel/g | $3.11 \times 10^9$    |
| 16 | Carbon, in organic matter, in soil                                                            | $9.78 \times 10^{-9}$  | $2.77 \times 10^9$    | sel/g | $2.71 \times 10^4$    |
| 17 | Cerium, 24% in bastnasite, 2.4% in crude ore, in ground                                       | $1.61 \times 10^{-7}$  | $1.14 \times 10^{10}$ | sel/g | $1.83 \times 10^6$    |
| 18 | Chromium, 25.5% in chromite, 11.6% in crude ore, in ground                                    | $2.38 \times 10^{-7}$  | $1.50 \times 10^{11}$ | sel/g | $3.57 \times 10^7$    |
| 19 | Chrysotile, in ground                                                                         | $1.75 \times 10^{-8}$  | $1.68 \times 10^9$    | sel/g | $2.94 \times 10^4$    |
| 20 | Cinnabar, in ground                                                                           | $1.63 \times 10^{-9}$  | $1.68 \times 10^9$    | sel/g | $2.74 \times 10^3$    |
| 21 | Clay, unspecified, in ground                                                                  | $6.37 \times 10^{-6}$  | $4.80 \times 10^9$    | sel/g | $3.06 \times 10^7$    |
| 22 | Coal                                                                                          | $4.90 \times 10^{-1}$  | $5.71 \times 10^4$    | sel/J | $2.80 \times 10^{10}$ |
| 23 | Cobalt, in ground                                                                             | $3.37 \times 10^{-7}$  | $1.30 \times 10^{11}$ | sel/g | $4.39 \times 10^7$    |
| 24 | Colemanite, in ground                                                                         | $4.59 \times 10^{-9}$  | $1.68 \times 10^9$    | sel/g | $7.71 \times 10^3$    |
| 25 | Copper, in ground                                                                             | $9.98 \times 10^{-8}$  | $9.80 \times 10^{10}$ | sel/g | $9.78 \times 10^6$    |
| 26 | Diatomite, in ground                                                                          | $2.03 \times 10^{-13}$ | $1.68 \times 10^9$    | sel/g | $3.40 \times 10^{-1}$ |
| 27 | Dolomite, in ground                                                                           | $9.53 \times 10^{-9}$  | $1.85 \times 10^{10}$ | sel/g | $1.76 \times 10^5$    |
| 28 | Energy, geothermal, converted                                                                 | $7.42 \times 10^{-4}$  | $4.52 \times 10^5$    | sel/J | $3.35 \times 10^8$    |
| 29 | Europium, 0.06% in bastnasite, 0.006% in crude ore, in ground                                 | $4.03 \times 10^{-10}$ | $1.68 \times 10^9$    | sel/g | $6.76 \times 10^2$    |
| 30 | Feldspar, in ground                                                                           | $1.98 \times 10^{-15}$ | $1.68 \times 10^9$    | sel/g | $3.33 \times 10^{-3}$ |
| 31 | Fluorine, in ground                                                                           | $1.04 \times 10^{-6}$  | $1.68 \times 10^9$    | sel/g | $1.75 \times 10^6$    |
| 32 | Fluorspar, 92%, in ground                                                                     | $2.13 \times 10^{-5}$  | $8.38 \times 10^8$    | sel/g | $1.79 \times 10^7$    |
| 33 | Gadolinium, 0.15% in bastnasite, 0.015% in crude ore, in ground                               | $1.00 \times 10^{-9}$  | $1.68 \times 10^9$    | sel/g | $1.69 \times 10^3$    |
| 34 | Gas, natural, in ground                                                                       | $1.24 \times 10^1$     | $6.83 \times 10^4$    | sel/J | $8.46 \times 10^{11}$ |
| 35 | Gold, in ground                                                                               | $2.40 \times 10^{-17}$ | $5.00 \times 10^{11}$ | sel/g | $1.20 \times 10^{-2}$ |
| 36 | Granite, in ground                                                                            | $1.70 \times 10^{-15}$ | $8.40 \times 10^8$    | sel/g | $1.43 \times 10^{-3}$ |
| 37 | Gravel, in ground                                                                             | $6.56 \times 10^{-5}$  | $8.40 \times 10^8$    | sel/g | $5.51 \times 10^7$    |
| 38 | Gypsum, in ground                                                                             | $2.62 \times 10^{-8}$  | $2.85 \times 10^9$    | sel/g | $7.46 \times 10^4$    |
| 39 | Indium, 0.005% in sulfide, In 0.003%, Pb, Zn, Ag, Cd, in ground                               | $1.19 \times 10^{-14}$ | $4.03 \times 10^{11}$ | sel/g | $4.79 \times 10^0$    |
| 40 | Iron, 46% in ore, 25% in crude ore, in ground                                                 | $4.64 \times 10^{-6}$  | $1.20 \times 10^{10}$ | sel/g | $5.57 \times 10^7$    |
| 41 | Kaolinite, 24% in crude ore, in ground                                                        | $3.64 \times 10^{-6}$  | $1.68 \times 10^9$    | sel/g | $6.11 \times 10^6$    |
| 42 | Kieserite, 25% in crude ore, in ground                                                        | $1.28 \times 10^{-10}$ | $1.68 \times 10^9$    | sel/g | $2.16 \times 10^2$    |
| 43 | Lanthanum, 7.2% in bastnasite, 0.72% in crude ore, in ground                                  | $4.82 \times 10^{-8}$  | $1.68 \times 10^9$    | sel/g | $8.09 \times 10^4$    |
| 44 | Lead, 5.0% in sulfide, Pb 3.0%, Zn, Ag, Cd, In, in ground                                     | $2.54 \times 10^{-11}$ | $4.80 \times 10^{11}$ | sel/g | $1.22 \times 10^4$    |
| 45 | Lithium, 0.15% in brine, in ground                                                            | $2.96 \times 10^{-14}$ | $9.27 \times 10^{11}$ | sel/g | $2.75 \times 10^1$    |
| 46 | Magnesite, 60% in crude ore, in ground                                                        | $1.23 \times 10^{-8}$  | $1.68 \times 10^9$    | sel/g | $2.06 \times 10^4$    |
| 47 | Manganese, 35.7% in sedimentary deposit, 14.2% in crude ore, in ground                        | $1.13 \times 10^{-9}$  | $3.50 \times 10^{11}$ | sel/g | $3.97 \times 10^5$    |
| 48 | Metamorphous rock, graphite containing, in ground                                             | $2.97 \times 10^{-8}$  | $1.68 \times 10^9$    | sel/g | $4.98 \times 10^4$    |
| 49 | Molybdenum, 0.025% in sulfide, Mo $8.2 \times 10^{-3}$ % and Cu 0.39% in crude ore, in ground | $6.78 \times 10^{-7}$  | $7.00 \times 10^{11}$ | sel/g | $4.75 \times 10^8$    |
| 50 | Neodymium, 4% in bastnasite, 0.4% in crude ore, in ground                                     | $2.65 \times 10^{-8}$  | $1.68 \times 10^9$    | sel/g | $4.45 \times 10^4$    |
| 51 | Nickel, 1.13% in sulfide, Ni 0.76% and Cu 0.76% in crude ore, in ground                       | $8.97 \times 10^{-7}$  | $2.00 \times 10^{11}$ | sel/g | $1.79 \times 10^8$    |
| 52 | Oil, crude, in ground                                                                         | $5.80 \times 10^1$     | $9.45 \times 10^4$    | sel/J | $5.48 \times 10^{12}$ |
| 53 | Olivine, in ground                                                                            | $2.74 \times 10^{-10}$ | $1.68 \times 10^9$    | sel/g | $4.61 \times 10^2$    |
| 54 | Pd, in ground                                                                                 | $1.41 \times 10^{-10}$ | $1.20 \times 10^{11}$ | sel/g | $1.69 \times 10^4$    |
| 55 | Phosphorus, 18% in apatite, 12% in crude ore, in ground                                       | $4.15 \times 10^{-6}$  | $2.07 \times 10^{10}$ | sel/g | $8.58 \times 10^7$    |
| 56 | Praseodymium, 0.42% in bastnasite, 0.042% in crude ore, in ground                             | $2.81 \times 10^{-9}$  | $1.68 \times 10^9$    | sel/g | $4.72 \times 10^3$    |
| 57 | Pt, in ground                                                                                 | $4.36 \times 10^{-12}$ | $3.70 \times 10^{11}$ | sel/g | $1.61 \times 10^3$    |
| 58 | Rh, in ground                                                                                 | $3.90 \times 10^{-12}$ | $1.20 \times 10^{12}$ | sel/g | $4.68 \times 10^3$    |
| 59 | Rhenium, in crude ore, in ground                                                              | $1.16 \times 10^{-12}$ | $8.93 \times 10^{12}$ | sel/g | $1.04 \times 10^4$    |
| 60 | Samarium, 0.3% in bastnasite, 0.03% in crude ore, in ground                                   | $2.01 \times 10^{-9}$  | $1.68 \times 10^9$    | sel/g | $3.37 \times 10^3$    |
| 61 | Sand, unspecified, in ground                                                                  | $1.64 \times 10^{-8}$  | $1.68 \times 10^9$    | sel/g | $2.76 \times 10^4$    |
| 62 | Shale, in ground                                                                              | $2.27 \times 10^{-9}$  | $1.68 \times 10^9$    | sel/g | $3.82 \times 10^3$    |
| 63 | Silver, in ground                                                                             | $6.52 \times 10^{-17}$ | $4.50 \times 10^{11}$ | sel/g | $2.93 \times 10^{-2}$ |
| 64 | Sodium chloride, in ground                                                                    | $7.95 \times 10^{-4}$  | $1.68 \times 10^9$    | sel/g | $1.34 \times 10^9$    |
| 65 | Sodium nitrate, in ground                                                                     | $8.51 \times 10^{-15}$ | $1.68 \times 10^9$    | sel/g | $1.43 \times 10^{-2}$ |
| 66 | Sodium sulphate, various forms, in ground                                                     | $6.04 \times 10^{-6}$  | $1.40 \times 10^9$    | sel/g | $8.44 \times 10^6$    |
| 67 | Stibnite, in ground                                                                           | $2.11 \times 10^{-14}$ | $1.68 \times 10^9$    | sel/g | $3.54 \times 10^{-2}$ |
| 68 | Sulfur, in ground                                                                             | $7.21 \times 10^{-6}$  | $2.08 \times 10^{10}$ | sel/g | $1.50 \times 10^8$    |



|    |                                                                              |                        |                       |       |                       |
|----|------------------------------------------------------------------------------|------------------------|-----------------------|-------|-----------------------|
| 69 | Sylvite, 25 % in sylvinite, in ground                                        | $7.96 \times 10^{-9}$  | $1.68 \times 10^9$    | seJ/g | $1.34 \times 10^4$    |
| 70 | Talc, in ground                                                              | $3.68 \times 10^{-9}$  | $2.80 \times 10^{10}$ | seJ/g | $1.03 \times 10^5$    |
| 71 | Tantalum, 81.9% in tantalite, $1.6 \times 10^{-4}\%$ in crude ore, in ground | $2.37 \times 10^{-17}$ | $1.70 \times 10^{11}$ | seJ/g | $4.03 \times 10^{-3}$ |
| 72 | Tellurium, 0.5ppm in sulfide, Te 0.2ppm, Cu and Ag, in crude ore, in ground  | $3.17 \times 10^{-18}$ | $5.04 \times 10^{13}$ | seJ/g | $1.60 \times 10^{-1}$ |
| 73 | Tin, 79% in cassiterite, 0.1% in crude ore, in ground                        | $2.84 \times 10^{-10}$ | $1.70 \times 10^{12}$ | seJ/g | $4.83 \times 10^5$    |
| 74 | TiO <sub>2</sub> , 54% in ilmenite, 2.6% in crude ore, in ground             | $1.18 \times 10^{-5}$  | $3.82 \times 10^{10}$ | seJ/g | $4.52 \times 10^8$    |
| 75 | Ulexite, in ground                                                           | $1.21 \times 10^{-17}$ | $1.68 \times 10^9$    | seJ/g | $2.03 \times 10^{-5}$ |
| 76 | Uranium, in ground                                                           | $1.55 \times 10^{-6}$  | $1.60 \times 10^{11}$ | seJ/g | $2.48 \times 10^8$    |
| 77 | Zinc, 9.0% in sulfide, Zn 5.3%, Pb, Ag, Cd, In, in ground                    | $7.32 \times 10^{-8}$  | $7.20 \times 10^{10}$ | seJ/g | $5.27 \times 10^6$    |
| 78 | Zirconium, 50% in zircon, 0.39% in crude ore, in ground                      | $3.26 \times 10^{-17}$ | $3.18 \times 10^{10}$ | seJ/g | $1.04 \times 10^{-3}$ |
| 79 | Magnesium, 0.13% in water                                                    | $3.74 \times 10^{-18}$ | $1.68 \times 10^9$    | seJ/g | $6.29 \times 10^{-6}$ |
| 80 | Water, cooling, unspecified natural origin                                   | $1.39 \times 10^{-2}$  | $2.70 \times 10^5$    | seJ/g | $3.76 \times 10^9$    |
| 81 | Water, lake                                                                  | $9.85 \times 10^{-7}$  | $4.52 \times 10^5$    | seJ/g | $4.45 \times 10^5$    |
| 82 | Water, process, unspecified natural origin                                   | $7.11 \times 10^{-4}$  | $6.74 \times 10^4$    | seJ/J | $2.00 \times 10^8$    |
| 83 | Water, river                                                                 | $2.86 \times 10^{-4}$  | $3.41 \times 10^5$    | seJ/g | $9.74 \times 10^7$    |
| 84 | Water, salt, ocean                                                           | $5.31 \times 10^{-4}$  | $5.36 \times 10^4$    | seJ/J | $1.19 \times 10^8$    |
| 85 | Water, salt, sole                                                            | $1.01 \times 10^{-3}$  | $5.36 \times 10^4$    | seJ/J | $2.26 \times 10^8$    |
| 86 | Water, unspecified natural origin                                            | $2.47 \times 10^{-3}$  | $3.06 \times 10^4$    | seJ/J | $3.16 \times 10^8$    |
| 87 | Water, well, in ground                                                       | $1.60 \times 10^{-4}$  | $6.89 \times 10^4$    | seJ/J | $4.60 \times 10^7$    |
|    |                                                                              | Emergia                |                       | seJ   | $6.40 \times 10^{12}$ |
|    |                                                                              | UEV                    |                       | seJ/g | $6.40 \times 10^9$    |

Table S7. LCI-based emergy required to produce 1 kg of p-xylene.

| INPUTS                                                         | QUANTIDAD              | UEV                   | UNIDAD | EMERGIA               |
|----------------------------------------------------------------|------------------------|-----------------------|--------|-----------------------|
|                                                                | ADE                    |                       | E      |                       |
| Energy, gross calorific value, in biomass                      | $5.86 \times 10^{-2}$  | $6.75 \times 10^4$    | seJ/J  | $3.96 \times 10^9$    |
| Peat, in ground                                                | $6.29 \times 10^{-7}$  | $3.19 \times 10^4$    | seJ/J  | $1.96 \times 10^5$    |
| Wood, primary forest, standing                                 | $1.01 \times 10^{-6}$  | $1.04 \times 10^4$    | seJ/J  | $1.19 \times 10^8$    |
| Carbon dioxide, in air                                         | $9.35 \times 10^{-3}$  | $8.87 \times 10^7$    | seJ/g  | $2.16 \times 10^6$    |
| Energy, kinetic (in wind), converted                           | $2.18 \times 10^{-2}$  | $9.90 \times 10^4$    | seJ/J  | $2.16 \times 10^9$    |
| Energy, solar, converted                                       | $1.71 \times 10^{-3}$  | $7.93 \times 10^4$    | seJ/J  | $1.36 \times 10^8$    |
| Energy, potential (in hydropower reservoir), converted         | $8.52 \times 10^{-2}$  | $1.35 \times 10^5$    | seJ/J  | $1.15 \times 10^{10}$ |
| Aluminium, 24% in bauxite, 11% in crude ore, in ground         | $2.05 \times 10^{-5}$  | $5.40 \times 10^9$    | seJ/g  | $1.11 \times 10^8$    |
| Anhydrite, in ground                                           | $8.78 \times 10^{-10}$ | $1.68 \times 10^9$    | seJ/g  | $1.48 \times 10^3$    |
| Barite, 15% in crude ore, in ground                            | $1.68 \times 10^{-6}$  | $1.68 \times 10^9$    | seJ/g  | $2.81 \times 10^6$    |
| Basalt, in ground                                              | $1.94 \times 10^{-11}$ | $7.56 \times 10^9$    | seJ/g  | $1.46 \times 10^2$    |
| Borax, in ground                                               | $1.60 \times 10^{-10}$ | $1.68 \times 10^9$    | seJ/g  | $2.69 \times 10^2$    |
| Cadmium, 0.30% in sulfide, Cd 0.18%, Pb, Zn, Ag, In, in ground | $9.47 \times 10^{-13}$ | $3.40 \times 10^{13}$ | seJ/g  | $3.22 \times 10^4$    |
| Calcite, in ground                                             | $1.92 \times 10^{-3}$  | $1.68 \times 10^9$    | seJ/g  | $3.22 \times 10^9$    |
| Carbon, in organic matter, in soil                             | $9.93 \times 10^{-9}$  | $2.77 \times 10^9$    | seJ/g  | $2.75 \times 10^4$    |
| Cerium, 24% in bastnasite, 2.4% in crude ore, in ground        | $2.18 \times 10^{-7}$  | $1.14 \times 10^{10}$ | seJ/g  | $2.48 \times 10^6$    |
| Chromium, 25.5% in chromite, 11.6% in crude ore, in ground     | $2.43 \times 10^{-7}$  | $1.50 \times 10^{11}$ | seJ/g  | $3.64 \times 10^7$    |
| Chrysotile, in ground                                          | $1.84 \times 10^{-8}$  | $1.68 \times 10^9$    | seJ/g  | $3.09 \times 10^4$    |

|                                                                                                 |                          |                         |       |                         |
|-------------------------------------------------------------------------------------------------|--------------------------|-------------------------|-------|-------------------------|
| Cinnabar, in ground                                                                             | 1.71 × 10 <sup>-9</sup>  | 1.68 × 10 <sup>9</sup>  | seJ/g | 2.87 × 10 <sup>3</sup>  |
| Clay, unspecified, in ground                                                                    | 6.51 × 10 <sup>-6</sup>  | 4.80 × 10 <sup>9</sup>  | seJ/g | 3.13 × 10 <sup>7</sup>  |
| Coal                                                                                            | 3.10 × 10 <sup>-1</sup>  | 5.71 × 10 <sup>4</sup>  | seJ/J | 1.77 × 10 <sup>10</sup> |
| Cobalt, in ground                                                                               | 4.57 × 10 <sup>-7</sup>  | 1.30 × 10 <sup>11</sup> | seJ/g | 5.94 × 10 <sup>7</sup>  |
| Colemanite, in ground                                                                           | 4.58 × 10 <sup>-9</sup>  | 1.68 × 10 <sup>9</sup>  | seJ/g | 7.70 × 10 <sup>3</sup>  |
| Copper, in ground                                                                               | 2.18 × 10 <sup>-8</sup>  | 9.80 × 10 <sup>10</sup> | seJ/g | 2.14 × 10 <sup>6</sup>  |
| Diatomite, in ground                                                                            | 2.02 × 10 <sup>-13</sup> | 1.68 × 10 <sup>9</sup>  | seJ/g | 3.39 × 10 <sup>-1</sup> |
| Dolomite, in ground                                                                             | 8.26 × 10 <sup>-9</sup>  | 1.85 × 10 <sup>10</sup> | seJ/g | 1.53 × 10 <sup>5</sup>  |
| Energy, geothermal, converted                                                                   | 4.10 × 10 <sup>-4</sup>  | 4.52 × 10 <sup>5</sup>  | seJ/J | 1.85 × 10 <sup>8</sup>  |
| Europium, 0.06% in bastnasite, 0.006% in crude ore, in ground                                   | 5.45 × 10 <sup>-10</sup> | 1.68 × 10 <sup>9</sup>  | seJ/g | 9.16 × 10 <sup>2</sup>  |
| Feldspar, in ground                                                                             | 2.01 × 10 <sup>-15</sup> | 1.68 × 10 <sup>9</sup>  | seJ/g | 3.38 × 10 <sup>-3</sup> |
| Fluorine, in ground                                                                             | 1.01 × 10 <sup>-6</sup>  | 1.68 × 10 <sup>9</sup>  | seJ/g | 1.71 × 10 <sup>6</sup>  |
| Fluorspar, 92%, in ground                                                                       | 2.09 × 10 <sup>-5</sup>  | 8.38 × 10 <sup>8</sup>  | seJ/g | 1.75 × 10 <sup>7</sup>  |
| Gadolinium, 0.15% in bastnasite, 0.015% in crude ore, in ground                                 | 1.36 × 10 <sup>-9</sup>  | 1.68 × 10 <sup>9</sup>  | seJ/g | 2.29 × 10 <sup>3</sup>  |
| Gas, natural, in ground                                                                         | 6.11 × 10 <sup>0</sup>   | 6.83 × 10 <sup>4</sup>  | seJ/J | 4.17 × 10 <sup>11</sup> |
| Gold, in ground                                                                                 | 2.40 × 10 <sup>-17</sup> | 5.00 × 10 <sup>11</sup> | seJ/g | 1.20 × 10 <sup>-2</sup> |
| Granite, in ground                                                                              | 1.74 × 10 <sup>-15</sup> | 8.40 × 10 <sup>8</sup>  | seJ/g | 1.46 × 10 <sup>-3</sup> |
| Gravel, in ground                                                                               | 7.80 × 10 <sup>-5</sup>  | 8.40 × 10 <sup>8</sup>  | seJ/g | 6.55 × 10 <sup>7</sup>  |
| Gypsum, in ground                                                                               | 2.07 × 10 <sup>-8</sup>  | 2.85 × 10 <sup>9</sup>  | seJ/g | 5.89 × 10 <sup>4</sup>  |
| Indium, 0.005% in sulfide, In 0.003%, Pb, Zn, Ag, Cd, in ground                                 | 1.41 × 10 <sup>-14</sup> | 4.03 × 10 <sup>11</sup> | seJ/g | 5.66 × 10 <sup>0</sup>  |
| Iron, 46% in ore, 25% in crude ore, in ground                                                   | 3.26 × 10 <sup>-6</sup>  | 1.20 × 10 <sup>10</sup> | seJ/g | 3.91 × 10 <sup>7</sup>  |
| Kaolinite, 24% in crude ore, in ground                                                          | 4.91 × 10 <sup>-6</sup>  | 1.68 × 10 <sup>9</sup>  | seJ/g | 8.26 × 10 <sup>6</sup>  |
| Kieserite, 25% in crude ore, in ground                                                          | 1.30 × 10 <sup>-10</sup> | 1.68 × 10 <sup>9</sup>  | seJ/g | 2.19 × 10 <sup>2</sup>  |
| Lanthanum, 7.2% in bastnasite, 0.72% in crude ore, in ground                                    | 6.52 × 10 <sup>-8</sup>  | 1.68 × 10 <sup>9</sup>  | seJ/g | 1.10 × 10 <sup>5</sup>  |
| Lead, 5.0% in sulfide, Pb 3.0%, Zn, Ag, Cd, In, in ground                                       | 2.66 × 10 <sup>-11</sup> | 4.80 × 10 <sup>11</sup> | seJ/g | 1.28 × 10 <sup>4</sup>  |
| Lithium, 0.15% in brine, in ground                                                              | 3.04 × 10 <sup>-14</sup> | 9.27 × 10 <sup>11</sup> | seJ/g | 2.82 × 10 <sup>1</sup>  |
| Magnesite, 60% in crude ore, in ground                                                          | 1.26 × 10 <sup>-8</sup>  | 1.68 × 10 <sup>9</sup>  | seJ/g | 2.12 × 10 <sup>4</sup>  |
| Manganese, 35.7% in sedimentary deposit, 14.2% in crude ore, in ground                          | 1.14 × 10 <sup>-9</sup>  | 3.50 × 10 <sup>11</sup> | seJ/g | 3.98 × 10 <sup>5</sup>  |
| Metamorphous rock, graphite containing, in ground                                               | 4.01 × 10 <sup>-8</sup>  | 1.68 × 10 <sup>9</sup>  | seJ/g | 6.73 × 10 <sup>4</sup>  |
| Molybdenum, 0.025% in sulfide, Mo 8.2 × 10 <sup>-3</sup> % and Cu 0.39% in crude ore, in ground | 8.68 × 10 <sup>-7</sup>  | 7.00 × 10 <sup>11</sup> | seJ/g | 6.07 × 10 <sup>8</sup>  |
| Neodymium, 4% in bastnasite, 0.4% in crude ore, in ground                                       | 3.59 × 10 <sup>-8</sup>  | 1.68 × 10 <sup>9</sup>  | seJ/g | 6.03 × 10 <sup>4</sup>  |
| Nickel, 1.13% in sulfide, Ni 0.76% and Cu 0.76% in crude ore, in ground                         | 1.01 × 10 <sup>-6</sup>  | 2.00 × 10 <sup>11</sup> | seJ/g | 2.01 × 10 <sup>8</sup>  |
| Oil, crude, in ground                                                                           | 6.01 × 10 <sup>1</sup>   | 9.45 × 10 <sup>4</sup>  | seJ/J | 5.68 × 10 <sup>12</sup> |
| Olivine, in ground                                                                              | 2.99 × 10 <sup>-10</sup> | 1.68 × 10 <sup>9</sup>  | seJ/g | 5.02 × 10 <sup>2</sup>  |
| Pd, in ground                                                                                   | 1.42 × 10 <sup>-10</sup> | 1.20 × 10 <sup>11</sup> | seJ/g | 1.71 × 10 <sup>4</sup>  |
| Phosphorus, 18% in apatite, 12% in crude ore, in ground                                         | 4.06 × 10 <sup>-6</sup>  | 2.07 × 10 <sup>10</sup> | seJ/g | 8.38 × 10 <sup>7</sup>  |

|                                                                                |                          |                         |       |                         |
|--------------------------------------------------------------------------------|--------------------------|-------------------------|-------|-------------------------|
| Praseodymium, 0.42% in bastnasite, 0.042% in crude ore, in ground              | 3.81 × 10 <sup>-9</sup>  | 1.68 × 10 <sup>9</sup>  | seJ/g | 6.39 × 10 <sup>3</sup>  |
| Pt, in ground                                                                  | 4.41 × 10 <sup>-12</sup> | 3.70 × 10 <sup>11</sup> | seJ/g | 1.63 × 10 <sup>3</sup>  |
| Rh, in ground                                                                  | 3.95 × 10 <sup>-12</sup> | 1.20 × 10 <sup>12</sup> | seJ/g | 4.74 × 10 <sup>3</sup>  |
| Rhenium, in crude ore, in ground                                               | 1.18 × 10 <sup>-12</sup> | 8.93 × 10 <sup>12</sup> | seJ/g | 1.05 × 10 <sup>4</sup>  |
| Samarium, 0.3% in bastnasite, 0.03% in crude ore, in ground                    | 2.72 × 10 <sup>-9</sup>  | 1.68 × 10 <sup>9</sup>  | seJ/g | 4.56 × 10 <sup>3</sup>  |
| Sand, unspecified, in ground                                                   | 1.52 × 10 <sup>-8</sup>  | 1.68 × 10 <sup>9</sup>  | seJ/g | 2.55 × 10 <sup>4</sup>  |
| Shale, in ground                                                               | 2.49 × 10 <sup>-9</sup>  | 1.68 × 10 <sup>9</sup>  | seJ/g | 4.18 × 10 <sup>3</sup>  |
| Silver, in ground                                                              | 6.51 × 10 <sup>-17</sup> | 4.50 × 10 <sup>11</sup> | seJ/g | 2.93 × 10 <sup>-2</sup> |
| Sodium chloride, in ground                                                     | 1.15 × 10 <sup>-3</sup>  | 1.68 × 10 <sup>9</sup>  | seJ/g | 1.93 × 10 <sup>9</sup>  |
| Sodium nitrate, in ground                                                      | 8.16 × 10 <sup>-15</sup> | 1.68 × 10 <sup>9</sup>  | seJ/g | 1.37 × 10 <sup>-2</sup> |
| Sodium sulphate, various forms, in ground                                      | 5.91 × 10 <sup>-6</sup>  | 1.40 × 10 <sup>9</sup>  | seJ/g | 8.25 × 10 <sup>6</sup>  |
| Stibnite, in ground                                                            | 2.10 × 10 <sup>-14</sup> | 1.68 × 10 <sup>9</sup>  | seJ/g | 3.53 × 10 <sup>-2</sup> |
| Sulfur, in ground                                                              | 2.93 × 10 <sup>-6</sup>  | 2.08 × 10 <sup>10</sup> | seJ/g | 6.09 × 10 <sup>7</sup>  |
| Sylvite, 25 % in sylvinite, in ground                                          | 8.06 × 10 <sup>-9</sup>  | 1.68 × 10 <sup>9</sup>  | seJ/g | 1.35 × 10 <sup>4</sup>  |
| Talc, in ground                                                                | 3.80 × 10 <sup>-9</sup>  | 2.80 × 10 <sup>10</sup> | seJ/g | 1.06 × 10 <sup>5</sup>  |
| Tantalum, 81.9% in tantalite, 1.6 × 10 <sup>-4</sup> % in crude ore, in ground | 2.37 × 10 <sup>-17</sup> | 1.70 × 10 <sup>11</sup> | seJ/g | 4.03 × 10 <sup>-3</sup> |
| Tellurium, 0.5ppm in sulfide, Te 0.2ppm, Cu and Ag, in crude ore, in ground    | 3.16 × 10 <sup>-18</sup> | 5.04 × 10 <sup>13</sup> | seJ/g | 1.59 × 10 <sup>-1</sup> |
| Tin, 79% in cassiterite, 0.1% in crude ore, in ground                          | 3.83 × 10 <sup>-10</sup> | 1.70 × 10 <sup>12</sup> | seJ/g | 6.52 × 10 <sup>5</sup>  |
| TiO2, 54% in ilmenite, 2.6% in crude ore, in ground                            | 1.16 × 10 <sup>-5</sup>  | 3.82 × 10 <sup>10</sup> | seJ/g | 4.42 × 10 <sup>8</sup>  |
| Ulexite, in ground                                                             | 1.21 × 10 <sup>-17</sup> | 1.68 × 10 <sup>9</sup>  | seJ/g | 2.03 × 10 <sup>-5</sup> |
| Uranium, in ground                                                             | 9.75 × 10 <sup>-7</sup>  | 1.60 × 10 <sup>11</sup> | seJ/g | 1.56 × 10 <sup>8</sup>  |
| Zinc, 9.0% in sulfide, Zn 5.3%, Pb, Ag, Cd, In, in ground                      | 1.82 × 10 <sup>-8</sup>  | 7.20 × 10 <sup>10</sup> | seJ/g | 1.31 × 10 <sup>6</sup>  |
| Zirconium, 50% in zircon, 0.39% in crude ore, in ground                        | 3.26 × 10 <sup>-17</sup> | 3.18 × 10 <sup>10</sup> | seJ/g | 1.04 × 10 <sup>-3</sup> |
| Magnesium, 0.13% in water                                                      | 3.74 × 10 <sup>-18</sup> | 1.68 × 10 <sup>9</sup>  | seJ/g | 6.28 × 10 <sup>-6</sup> |
| Water, cooling, unspecified natural origin                                     | 1.74 × 10 <sup>-2</sup>  | 2.70 × 10 <sup>5</sup>  | seJ/g | 4.70 × 10 <sup>9</sup>  |
| Water, lake                                                                    | 6.90 × 10 <sup>-7</sup>  | 4.52 × 10 <sup>5</sup>  | seJ/g | 3.12 × 10 <sup>5</sup>  |
| Water, process, unspecified natural origin                                     | 1.30 × 10 <sup>-3</sup>  | 6.74 × 10 <sup>4</sup>  | seJ/J | 3.66 × 10 <sup>8</sup>  |
| Water, river                                                                   | 2.85 × 10 <sup>-4</sup>  | 3.41 × 10 <sup>5</sup>  | seJ/g | 9.72 × 10 <sup>7</sup>  |
| Water, salt, ocean                                                             | 7.89 × 10 <sup>-4</sup>  | 5.36 × 10 <sup>4</sup>  | seJ/J | 1.77 × 10 <sup>8</sup>  |
| Water, salt, sole                                                              | 1.05 × 10 <sup>-3</sup>  | 5.36 × 10 <sup>4</sup>  | seJ/J | 2.35 × 10 <sup>8</sup>  |
| Water, unspecified natural origin                                              | 2.56 × 10 <sup>-3</sup>  | 3.06 × 10 <sup>4</sup>  | seJ/J | 3.27 × 10 <sup>8</sup>  |
| Water, well, in ground                                                         | 1.10 × 10 <sup>-4</sup>  | 6.89 × 10 <sup>4</sup>  | seJ/J | 3.18 × 10 <sup>7</sup>  |
|                                                                                |                          | Emergia                 | seJ   | 6.15 × 10 <sup>12</sup> |
|                                                                                |                          | UEV                     | seJ/g | 6.15 × 10 <sup>9</sup>  |

Table S8. LCI-based emergy required to produce 1 kg of ethylene oxide.

| INPUTS | QUANTIDAD | UEV | UNIDAD | EMERGIA |
|--------|-----------|-----|--------|---------|
|        | ADE       |     | E      |         |

|                                                                 |                          |                         |       |                         |
|-----------------------------------------------------------------|--------------------------|-------------------------|-------|-------------------------|
| Energy, gross calorific value, in biomass                       | 5.72 × 10 <sup>-1</sup>  | 6.75 × 10 <sup>4</sup>  | seJ/J | 3.86 × 10 <sup>10</sup> |
| Peat, in ground                                                 | 1.74 × 10 <sup>-6</sup>  | 3.19 × 10 <sup>4</sup>  | seJ/J | 5.43 × 10 <sup>5</sup>  |
| Wood, primary forest, standing                                  | 8.34 × 10 <sup>-7</sup>  | 1.04 × 10 <sup>4</sup>  | seJ/J | 9.80 × 10 <sup>7</sup>  |
| Carbon dioxide, in air                                          | 9.63 × 10 <sup>-2</sup>  | 8.87 × 10 <sup>7</sup>  | seJ/g | 1.60 × 10 <sup>7</sup>  |
| Energy, kinetic (in wind), converted                            | 1.61 × 10 <sup>-1</sup>  | 9.90 × 10 <sup>4</sup>  | seJ/J | 1.60 × 10 <sup>10</sup> |
| Energy, solar, converted                                        | 1.69 × 10 <sup>-2</sup>  | 7.93 × 10 <sup>4</sup>  | seJ/J | 1.34 × 10 <sup>9</sup>  |
| Energy, potential (in hydropower reservoir), converted          | 4.66 × 10 <sup>-1</sup>  | 1.35 × 10 <sup>5</sup>  | seJ/J | 6.29 × 10 <sup>10</sup> |
| Aluminium, 24% in bauxite, 11% in crude ore, in ground          | 1.37 × 10 <sup>-5</sup>  | 5.40 × 10 <sup>9</sup>  | seJ/g | 7.39 × 10 <sup>7</sup>  |
| Anhydrite, in ground                                            | 6.39 × 10 <sup>-10</sup> | 1.68 × 10 <sup>9</sup>  | seJ/g | 1.07 × 10 <sup>3</sup>  |
| Barite, 15% in crude ore, in ground                             | 1.27 × 10 <sup>-6</sup>  | 1.68 × 10 <sup>9</sup>  | seJ/g | 2.14 × 10 <sup>6</sup>  |
| Basalt, in ground                                               | 1.51 × 10 <sup>-11</sup> | 7.56 × 10 <sup>9</sup>  | seJ/g | 1.14 × 10 <sup>2</sup>  |
| Borax, in ground                                                | 1.28 × 10 <sup>-10</sup> | 1.68 × 10 <sup>9</sup>  | seJ/g | 2.15 × 10 <sup>2</sup>  |
| Cadmium, 0.30% in sulfide, Cd 0.18%, Pb, Zn, Ag, In, in ground  | 6.50 × 10 <sup>-13</sup> | 3.40 × 10 <sup>13</sup> | seJ/g | 2.21 × 10 <sup>4</sup>  |
| Calcite, in ground                                              | 5.41 × 10 <sup>-3</sup>  | 1.68 × 10 <sup>9</sup>  | seJ/g | 9.08 × 10 <sup>9</sup>  |
| Carbon, in organic matter, in soil                              | 7.78 × 10 <sup>-9</sup>  | 2.77 × 10 <sup>9</sup>  | seJ/g | 2.16 × 10 <sup>4</sup>  |
| Cerium, 24% in bastnasite, 2.4% in crude ore, in ground         | 1.28 × 10 <sup>-7</sup>  | 1.14 × 10 <sup>10</sup> | seJ/g | 1.46 × 10 <sup>6</sup>  |
| Chromium, 25.5% in chromite, 11.6% in crude ore, in ground      | 1.90 × 10 <sup>-7</sup>  | 1.50 × 10 <sup>11</sup> | seJ/g | 2.85 × 10 <sup>7</sup>  |
| Chrysotile, in ground                                           | 1.39 × 10 <sup>-8</sup>  | 1.68 × 10 <sup>9</sup>  | seJ/g | 2.34 × 10 <sup>4</sup>  |
| Cinnabar, in ground                                             | 1.30 × 10 <sup>-9</sup>  | 1.68 × 10 <sup>9</sup>  | seJ/g | 2.18 × 10 <sup>3</sup>  |
| Clay, unspecified, in ground                                    | 5.07 × 10 <sup>-6</sup>  | 4.80 × 10 <sup>9</sup>  | seJ/g | 2.44 × 10 <sup>7</sup>  |
| Coal                                                            | 1.69 × 10 <sup>0</sup>   | 5.71 × 10 <sup>4</sup>  | seJ/J | 9.65 × 10 <sup>10</sup> |
| Cobalt, in ground                                               | 2.69 × 10 <sup>-7</sup>  | 1.30 × 10 <sup>11</sup> | seJ/g | 3.49 × 10 <sup>7</sup>  |
| Colemanite, in ground                                           | 3.65 × 10 <sup>-9</sup>  | 1.68 × 10 <sup>9</sup>  | seJ/g | 6.14 × 10 <sup>3</sup>  |
| Copper, in ground                                               | 7.94 × 10 <sup>-8</sup>  | 9.80 × 10 <sup>10</sup> | seJ/g | 7.78 × 10 <sup>6</sup>  |
| Diatomite, in ground                                            | 1.61 × 10 <sup>-13</sup> | 1.68 × 10 <sup>9</sup>  | seJ/g | 2.71 × 10 <sup>-1</sup> |
| Dolomite, in ground                                             | 7.59 × 10 <sup>-9</sup>  | 1.85 × 10 <sup>10</sup> | seJ/g | 1.40 × 10 <sup>5</sup>  |
| Energy, geothermal, converted                                   | 3.49 × 10 <sup>-3</sup>  | 4.52 × 10 <sup>5</sup>  | seJ/J | 1.58 × 10 <sup>9</sup>  |
| Europium, 0.06% in bastnasite, 0.006% in crude ore, in ground   | 3.20 × 10 <sup>-10</sup> | 1.68 × 10 <sup>9</sup>  | seJ/g | 5.38 × 10 <sup>2</sup>  |
| Feldspar, in ground                                             | 1.58 × 10 <sup>-15</sup> | 1.68 × 10 <sup>9</sup>  | seJ/g | 2.65 × 10 <sup>-3</sup> |
| Fluorine, in ground                                             | 8.26 × 10 <sup>-7</sup>  | 1.68 × 10 <sup>9</sup>  | seJ/g | 1.39 × 10 <sup>6</sup>  |
| Fluorspar, 92%, in ground                                       | 1.70 × 10 <sup>-5</sup>  | 8.38 × 10 <sup>8</sup>  | seJ/g | 1.42 × 10 <sup>7</sup>  |
| Gadolinium, 0.15% in bastnasite, 0.015% in crude ore, in ground | 8.00 × 10 <sup>-10</sup> | 1.68 × 10 <sup>9</sup>  | seJ/g | 1.34 × 10 <sup>3</sup>  |
| Gas, natural, in ground                                         | 1.11 × 10 <sup>1</sup>   | 6.83 × 10 <sup>4</sup>  | seJ/J | 7.54 × 10 <sup>11</sup> |
| Gold, in ground                                                 | 1.91 × 10 <sup>-17</sup> | 5.00 × 10 <sup>11</sup> | seJ/g | 9.56 × 10 <sup>-3</sup> |
| Granite, in ground                                              | 1.36 × 10 <sup>-15</sup> | 8.40 × 10 <sup>8</sup>  | seJ/g | 1.14 × 10 <sup>-3</sup> |
| Gravel, in ground                                               | 5.22 × 10 <sup>-5</sup>  | 8.40 × 10 <sup>8</sup>  | seJ/g | 4.39 × 10 <sup>7</sup>  |

|                                                                                                 |                          |                         |       |                         |
|-------------------------------------------------------------------------------------------------|--------------------------|-------------------------|-------|-------------------------|
| Gypsum, in ground                                                                               | 2.08 × 10 <sup>-8</sup>  | 2.85 × 10 <sup>9</sup>  | seJ/g | 5.94 × 10 <sup>4</sup>  |
| Indium, 0.005% in sulfide, In 0.003%, Pb, Zn, Ag, Cd, in ground                                 | 9.47 × 10 <sup>-15</sup> | 4.03 × 10 <sup>11</sup> | seJ/g | 3.82 × 10 <sup>0</sup>  |
| Iron, 46% in ore, 25% in crude ore, in ground                                                   | 9.34 × 10 <sup>-6</sup>  | 1.20 × 10 <sup>10</sup> | seJ/g | 1.12 × 10 <sup>8</sup>  |
| Kaolinite, 24% in crude ore, in ground                                                          | 2.90 × 10 <sup>-6</sup>  | 1.68 × 10 <sup>9</sup>  | seJ/g | 4.86 × 10 <sup>6</sup>  |
| Kieserite, 25% in crude ore, in ground                                                          | 1.02 × 10 <sup>-10</sup> | 1.68 × 10 <sup>9</sup>  | seJ/g | 1.72 × 10 <sup>2</sup>  |
| Lanthanum, 7.2% in bastnasite, 0.72% in crude ore, in ground                                    | 3.83 × 10 <sup>-8</sup>  | 1.68 × 10 <sup>9</sup>  | seJ/g | 6.44 × 10 <sup>4</sup>  |
| Lead, 5.0% in sulfide, Pb 3.0%, Zn, Ag, Cd, In, in ground                                       | 2.02 × 10 <sup>-11</sup> | 4.80 × 10 <sup>11</sup> | seJ/g | 9.70 × 10 <sup>3</sup>  |
| Lithium, 0.15% in brine, in ground                                                              | 2.36 × 10 <sup>-14</sup> | 9.27 × 10 <sup>11</sup> | seJ/g | 2.19 × 10 <sup>1</sup>  |
| Magnesite, 60% in crude ore, in ground                                                          | 9.75 × 10 <sup>-9</sup>  | 1.68 × 10 <sup>9</sup>  | seJ/g | 1.64 × 10 <sup>4</sup>  |
| Manganese, 35.7% in sedimentary deposit, 14.2% in crude ore, in ground                          | 9.03 × 10 <sup>-10</sup> | 3.50 × 10 <sup>11</sup> | seJ/g | 3.16 × 10 <sup>5</sup>  |
| Metamorphous rock, graphite containing, in ground                                               | 2.37 × 10 <sup>-8</sup>  | 1.68 × 10 <sup>9</sup>  | seJ/g | 3.97 × 10 <sup>4</sup>  |
| Molybdenum, 0.025% in sulfide, Mo 8.2 × 10 <sup>-3</sup> % and Cu 0.39% in crude ore, in ground | 5.40 × 10 <sup>-7</sup>  | 7.00 × 10 <sup>11</sup> | seJ/g | 3.78 × 10 <sup>8</sup>  |
| Neodymium, 4% in bastnasite, 0.4% in crude ore, in ground                                       | 2.11 × 10 <sup>-8</sup>  | 1.68 × 10 <sup>9</sup>  | seJ/g | 3.54 × 10 <sup>4</sup>  |
| Nickel, 1.13% in sulfide, Ni 0.76% and Cu 0.76% in crude ore, in ground                         | 7.14 × 10 <sup>-7</sup>  | 2.00 × 10 <sup>11</sup> | seJ/g | 1.43 × 10 <sup>8</sup>  |
| Oil, crude, in ground                                                                           | 4.66 × 10 <sup>1</sup>   | 9.45 × 10 <sup>4</sup>  | seJ/l | 4.40 × 10 <sup>12</sup> |
| Olivine, in ground                                                                              | 2.18 × 10 <sup>-10</sup> | 1.68 × 10 <sup>9</sup>  | seJ/g | 3.67 × 10 <sup>2</sup>  |
| Pd, in ground                                                                                   | 1.12 × 10 <sup>-10</sup> | 1.20 × 10 <sup>11</sup> | seJ/g | 1.34 × 10 <sup>4</sup>  |
| Phosphorus, 18% in apatite, 12% in crude ore, in ground                                         | 3.30 × 10 <sup>-6</sup>  | 2.07 × 10 <sup>10</sup> | seJ/g | 6.82 × 10 <sup>7</sup>  |
| Praseodymium, 0.42% in bastnasite, 0.042% in crude ore, in ground                               | 2.24 × 10 <sup>-9</sup>  | 1.68 × 10 <sup>9</sup>  | seJ/g | 3.76 × 10 <sup>3</sup>  |
| Pt, in ground                                                                                   | 3.47 × 10 <sup>-12</sup> | 3.70 × 10 <sup>11</sup> | seJ/g | 1.28 × 10 <sup>3</sup>  |
| Rh, in ground                                                                                   | 3.10 × 10 <sup>-12</sup> | 1.20 × 10 <sup>12</sup> | seJ/g | 3.73 × 10 <sup>3</sup>  |
| Rhenium, in crude ore, in ground                                                                | 9.25 × 10 <sup>-13</sup> | 8.93 × 10 <sup>12</sup> | seJ/g | 8.26 × 10 <sup>3</sup>  |
| Samarium, 0.3% in bastnasite, 0.03% in crude ore, in ground                                     | 1.60 × 10 <sup>-9</sup>  | 1.68 × 10 <sup>9</sup>  | seJ/g | 2.68 × 10 <sup>3</sup>  |
| Sand, unspecified, in ground                                                                    | 2.49 × 10 <sup>-8</sup>  | 1.68 × 10 <sup>9</sup>  | seJ/g | 4.18 × 10 <sup>4</sup>  |
| Shale, in ground                                                                                | 1.81 × 10 <sup>-9</sup>  | 1.68 × 10 <sup>9</sup>  | seJ/g | 3.04 × 10 <sup>3</sup>  |
| Silver, in ground                                                                               | 5.19 × 10 <sup>-17</sup> | 4.50 × 10 <sup>11</sup> | seJ/g | 2.34 × 10 <sup>-2</sup> |
| Sodium chloride, in ground                                                                      | 6.68 × 10 <sup>-4</sup>  | 1.68 × 10 <sup>9</sup>  | seJ/g | 1.12 × 10 <sup>9</sup>  |
| Sodium nitrate, in ground                                                                       | 6.77 × 10 <sup>-15</sup> | 1.68 × 10 <sup>9</sup>  | seJ/g | 1.14 × 10 <sup>-2</sup> |
| Sodium sulphate, various forms, in ground                                                       | 4.81 × 10 <sup>-6</sup>  | 1.40 × 10 <sup>9</sup>  | seJ/g | 6.72 × 10 <sup>6</sup>  |
| Stibnite, in ground                                                                             | 1.68 × 10 <sup>-14</sup> | 1.68 × 10 <sup>9</sup>  | seJ/g | 2.82 × 10 <sup>-2</sup> |
| Sulfur, in ground                                                                               | 3.38 × 10 <sup>-5</sup>  | 2.08 × 10 <sup>10</sup> | seJ/g | 7.04 × 10 <sup>8</sup>  |
| Sylvite, 25 % in sylvinitite, in ground                                                         | 6.33 × 10 <sup>-9</sup>  | 1.68 × 10 <sup>9</sup>  | seJ/g | 1.06 × 10 <sup>4</sup>  |
| Talc, in ground                                                                                 | 2.93 × 10 <sup>-9</sup>  | 2.80 × 10 <sup>10</sup> | seJ/g | 8.19 × 10 <sup>4</sup>  |
| Tantalum, 81.9% in tantalite, 1.6 × 10 <sup>-4</sup> % in crude ore, in ground                  | 1.89 × 10 <sup>-17</sup> | 1.70 × 10 <sup>11</sup> | seJ/g | 3.21 × 10 <sup>-3</sup> |
| Tellurium, 0.5ppm in sulfide, Te 0.2ppm, Cu and Ag, in crude ore, in ground                     | 2.52 × 10 <sup>-18</sup> | 5.04 × 10 <sup>13</sup> | seJ/g | 1.27 × 10 <sup>-1</sup> |
| Tin, 79% in cassiterite, 0.1% in crude ore, in ground                                           | 2.26 × 10 <sup>-10</sup> | 1.70 × 10 <sup>12</sup> | seJ/g | 3.84 × 10 <sup>5</sup>  |

|                                                                  |                          |                         |       |                         |
|------------------------------------------------------------------|--------------------------|-------------------------|-------|-------------------------|
| TiO <sub>2</sub> , 54% in ilmenite, 2.6% in crude ore, in ground | 9.41 × 10 <sup>-6</sup>  | 3.82 × 10 <sup>10</sup> | seJ/g | 3.60 × 10 <sup>8</sup>  |
| Ulexite, in ground                                               | 9.63 × 10 <sup>-18</sup> | 1.68 × 10 <sup>9</sup>  | seJ/g | 1.62 × 10 <sup>-5</sup> |
| Uranium, in ground                                               | 5.01 × 10 <sup>-6</sup>  | 1.60 × 10 <sup>11</sup> | seJ/g | 8.02 × 10 <sup>8</sup>  |
| Zinc, 9.0% in sulfide, Zn 5.3%, Pb, Ag, Cd, In, in ground        | 5.83 × 10 <sup>-8</sup>  | 7.20 × 10 <sup>10</sup> | seJ/g | 4.20 × 10 <sup>6</sup>  |
| Zirconium, 50% in zircon, 0.39% in crude ore, in ground          | 2.60 × 10 <sup>-17</sup> | 3.18 × 10 <sup>10</sup> | seJ/g | 8.26 × 10 <sup>-4</sup> |
| Magnesium, 0.13% in water                                        | 2.98 × 10 <sup>-18</sup> | 1.68 × 10 <sup>9</sup>  | seJ/g | 5.00 × 10 <sup>-6</sup> |
| Water, cooling, unspecified natural origin                       | 3.35 × 10 <sup>-2</sup>  | 2.70 × 10 <sup>5</sup>  | seJ/g | 9.07 × 10 <sup>9</sup>  |
| Water, lake                                                      | 7.84 × 10 <sup>-7</sup>  | 4.52 × 10 <sup>5</sup>  | seJ/g | 3.54 × 10 <sup>5</sup>  |
| Water, process, unspecified natural origin                       | 1.02 × 10 <sup>-3</sup>  | 6.74 × 10 <sup>4</sup>  | seJ/J | 2.87 × 10 <sup>8</sup>  |
| Water, river                                                     | 2.27 × 10 <sup>-4</sup>  | 3.41 × 10 <sup>5</sup>  | seJ/g | 7.76 × 10 <sup>7</sup>  |
| Water, salt, ocean                                               | 4.23 × 10 <sup>-4</sup>  | 5.36 × 10 <sup>4</sup>  | seJ/J | 9.48 × 10 <sup>7</sup>  |
| Water, salt, sole                                                | 8.04 × 10 <sup>-4</sup>  | 5.36 × 10 <sup>4</sup>  | seJ/J | 1.80 × 10 <sup>8</sup>  |
| Water, unspecified natural origin                                | 1.98 × 10 <sup>-3</sup>  | 3.06 × 10 <sup>4</sup>  | seJ/J | 2.54 × 10 <sup>8</sup>  |
| Water, well, in ground                                           | 5.07 × 10 <sup>-4</sup>  | 6.89 × 10 <sup>4</sup>  | seJ/J | 1.46 × 10 <sup>8</sup>  |
|                                                                  |                          | Emergia                 | seJ   | 5.40 × 10 <sup>12</sup> |
|                                                                  |                          | UEV                     | seJ/g | 5.40 × 10 <sup>9</sup>  |

Table S9. LCI-based emergy required to produce 1 kg of ethylene glycol.

| INPUTS                                                         | QUANTIDAD                | UEV                     | UNIDAD | EMERGIA                 |
|----------------------------------------------------------------|--------------------------|-------------------------|--------|-------------------------|
| Energy, gross calorific value, in biomass                      | 6.16 × 10 <sup>-1</sup>  | 6.75 × 10 <sup>4</sup>  | seJ/J  | 4.16 × 10 <sup>10</sup> |
| Peat, in ground                                                | 1.24 × 10 <sup>-6</sup>  | 3.19 × 10 <sup>4</sup>  | seJ/J  | 3.88 × 10 <sup>5</sup>  |
| Wood, primary forest, standing                                 | 5.95 × 10 <sup>-7</sup>  | 1.04 × 10 <sup>4</sup>  | seJ/J  | 6.99 × 10 <sup>7</sup>  |
| Carbon dioxide, in air                                         | 1.04 × 10 <sup>-1</sup>  | 8.87 × 10 <sup>7</sup>  | seJ/g  | 1.71 × 10 <sup>7</sup>  |
| Energy, kinetic (in wind), converted                           | 1.73 × 10 <sup>-1</sup>  | 9.90 × 10 <sup>4</sup>  | seJ/J  | 1.71 × 10 <sup>10</sup> |
| Energy, solar, converted                                       | 1.82 × 10 <sup>-2</sup>  | 7.93 × 10 <sup>4</sup>  | seJ/J  | 1.45 × 10 <sup>9</sup>  |
| Energy, potential (in hydropower reservoir), converted         | 4.90 × 10 <sup>-1</sup>  | 1.35 × 10 <sup>5</sup>  | seJ/J  | 6.61 × 10 <sup>10</sup> |
| Aluminium, 24% in bauxite, 11% in crude ore, in ground         | 1.02 × 10 <sup>-5</sup>  | 5.40 × 10 <sup>9</sup>  | seJ/g  | 5.51 × 10 <sup>7</sup>  |
| Anhydrite, in ground                                           | 4.56 × 10 <sup>-10</sup> | 1.68 × 10 <sup>9</sup>  | seJ/g  | 7.66 × 10 <sup>2</sup>  |
| Barite, 15% in crude ore, in ground                            | 9.07 × 10 <sup>-7</sup>  | 1.68 × 10 <sup>9</sup>  | seJ/g  | 1.52 × 10 <sup>6</sup>  |
| Basalt, in ground                                              | 1.07 × 10 <sup>-11</sup> | 7.56 × 10 <sup>9</sup>  | seJ/g  | 8.12 × 10 <sup>1</sup>  |
| Borax, in ground                                               | 9.12 × 10 <sup>-11</sup> | 1.68 × 10 <sup>9</sup>  | seJ/g  | 1.53 × 10 <sup>2</sup>  |
|                                                                |                          | 3.40 × 10 <sup>13</sup> | seJ/g  | 1.58 × 10 <sup>4</sup>  |
| Cadmium, 0.30% in sulfide, Cd 0.18%, Pb, Zn, Ag, In, in ground | 4.64 × 10 <sup>-13</sup> | 1.68 × 10 <sup>9</sup>  | seJ/g  | 9.42 × 10 <sup>9</sup>  |
| Calcite, in ground                                             | 5.61 × 10 <sup>-3</sup>  | 2.77 × 10 <sup>9</sup>  | seJ/g  | 1.54 × 10 <sup>4</sup>  |
| Carbon, in organic matter, in soil                             | 5.55 × 10 <sup>-9</sup>  | 1.14 × 10 <sup>10</sup> | seJ/g  | 1.04 × 10 <sup>6</sup>  |
|                                                                |                          | 1.50 × 10 <sup>11</sup> | seJ/g  | 2.04 × 10 <sup>7</sup>  |
| Chromium, 25.5% in chromite, 11.6% in crude ore, in ground     | 1.36 × 10 <sup>-7</sup>  | 1.68 × 10 <sup>9</sup>  | seJ/g  | 1.67 × 10 <sup>4</sup>  |
| Chrysotile, in ground                                          | 9.92 × 10 <sup>-9</sup>  | 1.68 × 10 <sup>9</sup>  | seJ/g  | 1.56 × 10 <sup>3</sup>  |
| Cinnabar, in ground                                            | 9.26 × 10 <sup>-10</sup> | 4.80 × 10 <sup>9</sup>  | seJ/g  | 1.74 × 10 <sup>7</sup>  |
| Clay, unspecified, in ground                                   | 3.62 × 10 <sup>-6</sup>  | 5.71 × 10 <sup>4</sup>  | seJ/J  | 1.02 × 10 <sup>11</sup> |
| Coal                                                           | 1.79 × 10 <sup>0</sup>   | 1.30 × 10 <sup>10</sup> | seJ/g  | 5.55 × 10 <sup>6</sup>  |
|                                                                |                          | 1.85 × 10 <sup>11</sup> | seJ/g  | 1.93 × 10 <sup>-1</sup> |
| Cobalt, in ground                                              | 1.92 × 10 <sup>-7</sup>  | 1.68 × 10 <sup>9</sup>  | seJ/g  | 2.49 × 10 <sup>7</sup>  |
| Colemanite, in ground                                          | 2.61 × 10 <sup>-9</sup>  | 9.80 × 10 <sup>9</sup>  | seJ/g  | 4.38 × 10 <sup>3</sup>  |
|                                                                |                          | 1.01 × 10 <sup>10</sup> | seJ/g  | 5.55 × 10 <sup>6</sup>  |
| Copper, in ground                                              | 5.67 × 10 <sup>-8</sup>  | 1.68 × 10 <sup>9</sup>  | seJ/g  | 1.93 × 10 <sup>-1</sup> |
| Diatomite, in ground                                           | 1.15 × 10 <sup>-13</sup> | 1.85 × 10 <sup>9</sup>  | seJ/g  | 1.00 × 10 <sup>5</sup>  |
|                                                                |                          | 1.01 × 10 <sup>10</sup> | seJ/g  | 1.70 × 10 <sup>9</sup>  |
| Dolomite, in ground                                            | 5.41 × 10 <sup>-9</sup>  | 1.68 × 10 <sup>9</sup>  | seJ/g  | 3.84 × 10 <sup>2</sup>  |
| Energy, geothermal, converted                                  | 3.77 × 10 <sup>-3</sup>  | 1.68 × 10 <sup>9</sup>  | seJ/g  | 1.89 × 10 <sup>-3</sup> |
| Europium, 0.06% in bastnasite, 0.006% in crude ore, in ground  | 2.29 × 10 <sup>-10</sup> | 1.68 × 10 <sup>9</sup>  | seJ/g  | 9.90 × 10 <sup>5</sup>  |
| Feldspar, in ground                                            | 1.12 × 10 <sup>-15</sup> | 1.68 × 10 <sup>9</sup>  | seJ/g  |                         |
| Fluorine, in ground                                            | 5.89 × 10 <sup>-7</sup>  | 1.68 × 10 <sup>9</sup>  | seJ/g  |                         |

|                                                                                               |    |                        |                    |       |                       |
|-----------------------------------------------------------------------------------------------|----|------------------------|--------------------|-------|-----------------------|
| Fluorspar, 92%, in ground                                                                     |    | $1.21 \times 10^{-5}$  | $8.38 \times 10^8$ | seI/g | $1.01 \times 10^7$    |
| Gadolinium, 0.15% in bastnasite, 0.015% in crude ore, in ground                               |    | $5.71 \times 10^{-10}$ | $1.68 \times 10^9$ | seI/g | $9.59 \times 10^2$    |
| Gas, natural, in ground                                                                       |    | $8.41 \times 10^0$     | $6.83 \times 10^4$ | seI/J | $5.74 \times 10^{11}$ |
|                                                                                               |    |                        | $5.00 \times$      |       |                       |
| Gold, in ground                                                                               |    | $1.36 \times 10^{-17}$ | $10^{11}$          | seI/g | $6.82 \times 10^{-3}$ |
| Granite, in ground                                                                            |    | $9.68 \times 10^{-16}$ | $8.40 \times 10^8$ | seI/g | $8.13 \times 10^{-4}$ |
| Gravel, in ground                                                                             |    | $3.73 \times 10^{-5}$  | $8.40 \times 10^8$ | seI/g | $3.13 \times 10^7$    |
| Gypsum, in ground                                                                             |    | $1.49 \times 10^{-8}$  | $2.85 \times 10^9$ | seI/g | $4.24 \times 10^4$    |
|                                                                                               |    |                        | $4.03 \times$      |       |                       |
| Indium, 0.005% in sulfide, In 0.003%, Pb, Zn, Ag, Cd, in ground                               | IN | $6.76 \times 10^{-15}$ | $10^{11}$          | seI/g | $2.72 \times 10^0$    |
|                                                                                               |    |                        | $1.20 \times$      |       |                       |
| Iron, 46% in ore, 25% in crude ore, in ground                                                 |    | $9.17 \times 10^{-6}$  | $10^{10}$          | seI/g | $1.10 \times 10^8$    |
| Kaolinite, 24% in crude ore, in ground                                                        |    | $2.07 \times 10^{-6}$  | $1.68 \times 10^9$ | seI/g | $3.47 \times 10^6$    |
| Kieserite, 25% in crude ore, in ground                                                        |    | $7.29 \times 10^{-11}$ | $1.68 \times 10^9$ | seI/g | $1.22 \times 10^2$    |
| Lanthanum, 7.2% in bastnasite, 0.72% in crude ore, in ground                                  |    | $2.74 \times 10^{-8}$  | $1.68 \times 10^9$ | seI/g | $4.60 \times 10^4$    |
|                                                                                               |    |                        | $4.80 \times$      |       |                       |
| Lead, 5.0% in sulfide, Pb 3.0%, Zn, Ag, Cd, In, in ground                                     |    | $1.44 \times 10^{-11}$ | $10^{11}$          | seI/g | $6.92 \times 10^3$    |
|                                                                                               |    |                        | $9.27 \times$      |       |                       |
| Lithium, 0.15% in brine, in ground                                                            |    | $1.68 \times 10^{-14}$ | $10^{11}$          | seI/g | $1.56 \times 10^1$    |
| Magnesite, 60% in crude ore, in ground                                                        |    | $6.96 \times 10^{-9}$  | $1.68 \times 10^9$ | seI/g | $1.17 \times 10^4$    |
|                                                                                               |    |                        | $3.50 \times$      |       |                       |
| Manganese, 35.7% in sedimentary deposit, 14.2% in crude ore, in ground                        |    | $6.44 \times 10^{-10}$ | $10^{11}$          | seI/g | $2.25 \times 10^5$    |
| Metamorphous rock, graphite containing, in ground                                             |    | $1.69 \times 10^{-8}$  | $1.68 \times 10^9$ | seI/g | $2.83 \times 10^4$    |
| Molybdenum, 0.025% in sulfide, Mo $8.2 \times 10^{-3}\%$ and Cu 0.39% in crude ore, in ground |    |                        | $7.00 \times$      |       |                       |
|                                                                                               |    | $3.85 \times 10^{-7}$  | $10^{11}$          | seI/g | $2.70 \times 10^8$    |
| Neodymium, 4% in bastnasite, 0.4% in crude ore, in ground                                     |    | $1.50 \times 10^{-8}$  | $1.68 \times 10^9$ | seI/g | $2.53 \times 10^4$    |
|                                                                                               |    |                        | $2.00 \times$      |       |                       |
| Nickel, 1.13% in sulfide, Ni 0.76% and Cu 0.76% in crude ore, in ground                       |    | $5.10 \times 10^{-7}$  | $10^{11}$          | seI/g | $1.02 \times 10^8$    |
| Oil, crude, in ground                                                                         |    | $3.34 \times 10^1$     | $9.45 \times 10^4$ | seI/J | $3.16 \times 10^{12}$ |
| Olivine, in ground                                                                            |    | $1.56 \times 10^{-10}$ | $1.68 \times 10^9$ | seI/g | $2.62 \times 10^2$    |
|                                                                                               |    |                        | $1.20 \times$      |       |                       |
| Pd, in ground                                                                                 |    | $7.98 \times 10^{-11}$ | $10^{11}$          | seI/g | $9.58 \times 10^3$    |
|                                                                                               |    |                        | $2.07 \times$      |       |                       |
| Phosphorus, 18% in apatite, 12% in crude ore, in ground                                       |    | $2.36 \times 10^{-6}$  | $10^{10}$          | seI/g | $4.87 \times 10^7$    |
| Praseodymium, 0.42% in bastnasite, 0.042% in crude ore, in ground                             |    | $1.60 \times 10^{-9}$  | $1.68 \times 10^9$ | seI/g | $2.68 \times 10^3$    |
|                                                                                               |    |                        | $3.70 \times$      |       |                       |
| Pt, in ground                                                                                 |    | $2.47 \times 10^{-12}$ | $10^{11}$          | seI/g | $9.16 \times 10^2$    |
|                                                                                               |    |                        | $1.20 \times$      |       |                       |
| Rh, in ground                                                                                 |    | $2.22 \times 10^{-12}$ | $10^{12}$          | seI/g | $2.66 \times 10^3$    |
|                                                                                               |    |                        | $8.93 \times$      |       |                       |
| Rhenium, in crude ore, in ground                                                              |    | $6.60 \times 10^{-13}$ | $10^{12}$          | seI/g | $5.90 \times 10^3$    |
| Samarium, 0.3% in bastnasite, 0.03% in crude ore, in ground                                   |    | $1.14 \times 10^{-9}$  | $1.68 \times 10^9$ | seI/g | $1.91 \times 10^3$    |
| Sand, unspecified, in ground                                                                  |    | $2.30 \times 10^{-8}$  | $1.68 \times 10^9$ | seI/g | $3.87 \times 10^4$    |
| Shale, in ground                                                                              |    | $1.29 \times 10^{-9}$  | $1.68 \times 10^9$ | seI/g | $2.17 \times 10^3$    |
|                                                                                               |    |                        | $4.50 \times$      |       |                       |
| Silver, in ground                                                                             |    | $3.70 \times 10^{-17}$ | $10^{11}$          | seI/g | $1.67 \times 10^{-2}$ |
| Sodium chloride, in ground                                                                    |    | $4.92 \times 10^{-4}$  | $1.68 \times 10^9$ | seI/g | $8.26 \times 10^8$    |
| Sodium nitrate, in ground                                                                     |    | $4.83 \times 10^{-15}$ | $1.68 \times 10^9$ | seI/g | $8.12 \times 10^{-3}$ |
| Sodium sulphate, various forms, in ground                                                     |    | $3.43 \times 10^{-6}$  | $1.40 \times 10^9$ | seI/g | $4.79 \times 10^6$    |
| Stibnite, in ground                                                                           |    | $1.20 \times 10^{-14}$ | $1.68 \times 10^9$ | seI/g | $2.01 \times 10^{-2}$ |
|                                                                                               |    |                        | $2.08 \times$      |       |                       |
| Sulfur, in ground                                                                             |    | $3.66 \times 10^{-5}$  | $10^{10}$          | seI/g | $7.62 \times 10^8$    |
| Sylvite, 25 % in sylvinit, in ground                                                          |    | $4.52 \times 10^{-9}$  | $1.68 \times 10^9$ | seI/g | $7.59 \times 10^3$    |
|                                                                                               |    |                        | $2.80 \times$      |       |                       |
| Talc, in ground                                                                               |    | $2.09 \times 10^{-9}$  | $10^{10}$          | seI/g | $5.85 \times 10^4$    |
|                                                                                               |    |                        | $1.70 \times$      |       |                       |
| Tantalum, 81.9% in tantalite, $1.6 \times 10^{-4}\%$ in crude ore, in ground                  |    | $1.35 \times 10^{-17}$ | $10^{11}$          | seI/g | $2.29 \times 10^{-3}$ |
|                                                                                               |    |                        | $5.04 \times$      |       |                       |
| Tellurium, 0.5ppm in sulfide, Te 0.2ppm, Cu and Ag, in crude ore, in ground                   |    | $1.80 \times 10^{-18}$ | $10^{13}$          | seI/g | $9.06 \times 10^{-2}$ |
|                                                                                               |    |                        | $1.70 \times$      |       |                       |
| Tin, 79% in cassiterite, 0.1% in crude ore, in ground                                         |    | $1.61 \times 10^{-10}$ | $10^{12}$          | seI/g | $2.74 \times 10^5$    |
|                                                                                               |    |                        | $3.82 \times$      |       |                       |
| TiO2, 54% in ilmenite, 2.6% in crude ore, in ground                                           |    | $6.72 \times 10^{-6}$  | $10^{10}$          | seI/g | $2.57 \times 10^8$    |
| Ulexite, in ground                                                                            |    | $6.87 \times 10^{-18}$ | $1.68 \times 10^9$ | seI/g | $1.15 \times 10^{-5}$ |
|                                                                                               |    |                        | $1.60 \times$      |       |                       |
| Uranium, in ground                                                                            |    | $5.25 \times 10^{-6}$  | $10^{11}$          | seI/g | $8.41 \times 10^8$    |
|                                                                                               |    |                        | $7.20 \times$      |       |                       |
| Zinc, 9.0% in sulfide, Zn 5.3%, Pb, Ag, Cd, In, in ground                                     |    | $4.16 \times 10^{-8}$  | $10^{10}$          | seI/g | $2.99 \times 10^6$    |
|                                                                                               |    |                        | $3.18 \times$      |       |                       |
| Zirconium, 50% in zircon, 0.39% in crude ore, in ground                                       |    | $1.85 \times 10^{-17}$ | $10^{10}$          | seI/g | $5.89 \times 10^{-4}$ |
| Magnesium, 0.13% in water                                                                     |    | $2.13 \times 10^{-18}$ | $1.68 \times 10^9$ | seI/g | $3.57 \times 10^{-6}$ |

|                                            |                       |                    |       |                       |
|--------------------------------------------|-----------------------|--------------------|-------|-----------------------|
| Water, cooling, unspecified natural origin | $3.35 \times 10^{-2}$ | $2.70 \times 10^5$ | seJ/g | $9.06 \times 10^9$    |
| Water, lake                                | $5.59 \times 10^{-7}$ | $4.52 \times 10^5$ | seJ/g | $2.53 \times 10^5$    |
| Water, process, unspecified natural origin | $6.69 \times 10^{-3}$ | $6.74 \times 10^4$ | seJ/J | $1.89 \times 10^9$    |
| Water, river                               | $1.62 \times 10^{-4}$ | $3.41 \times 10^5$ | seJ/g | $5.53 \times 10^7$    |
| Water, salt, ocean                         | $3.02 \times 10^{-4}$ | $5.36 \times 10^4$ | seJ/J | $6.76 \times 10^7$    |
| Water, salt, sole                          | $5.74 \times 10^{-4}$ | $5.36 \times 10^4$ | seJ/J | $1.29 \times 10^8$    |
| Water, unspecified natural origin          | $1.42 \times 10^{-3}$ | $3.06 \times 10^4$ | seJ/J | $1.82 \times 10^8$    |
| Water, well, in ground                     | $5.30 \times 10^{-4}$ | $6.89 \times 10^4$ | seJ/J | $1.53 \times 10^8$    |
|                                            |                       | Emergia            | seJ   | $3.99 \times 10^{12}$ |
|                                            |                       | UEV                | seJ/g | $3.99 \times 10^9$    |

Table S10. LCI-based energy required to produce 1 kg of purified terephthalic acid.

| INPUTS |                                                                 | QUANTID                |                       | UNIDAD | EMERGIA               |
|--------|-----------------------------------------------------------------|------------------------|-----------------------|--------|-----------------------|
|        |                                                                 | ADE                    | UEV                   | E      |                       |
| 1      | Energy, gross calorific value, in biomass                       | $2.12 \times 10^{-1}$  | $6.75 \times 10^4$    | seJ/J  | $1.43 \times 10^{10}$ |
| 3      | Peat, in ground                                                 | $5.89 \times 10^{-6}$  | $3.19 \times 10^4$    | seJ/J  | $1.83 \times 10^6$    |
| 4      | Wood, primary forest, standing                                  | $1.76 \times 10^{-6}$  | $1.04 \times 10^4$    | seJ/J  | $2.07 \times 10^8$    |
| 5      | Carbon dioxide, in air                                          | $3.48 \times 10^{-2}$  | $8.87 \times 10^7$    | seJ/g  | $1.31 \times 10^7$    |
| 6      | Energy, kinetic (in wind), converted                            | $1.32 \times 10^{-1}$  | $9.90 \times 10^4$    | seJ/J  | $1.31 \times 10^{10}$ |
| 7      | Energy, solar, converted                                        | $3.60 \times 10^{-2}$  | $7.93 \times 10^4$    | seJ/J  | $2.85 \times 10^9$    |
| 8      | Energy, potential (in hydropower reservoir), converted          | $2.42 \times 10^{-1}$  | $1.35 \times 10^5$    | seJ/J  | $3.26 \times 10^{10}$ |
| 9      | Aluminium, 24% in bauxite, 11% in crude ore, in ground          | $2.16 \times 10^{-5}$  | $5.40 \times 10^9$    | seJ/g  | $1.17 \times 10^8$    |
| 10     | Anhydrite, in ground                                            | $1.82 \times 10^{-9}$  | $1.68 \times 10^9$    | seJ/g  | $3.05 \times 10^3$    |
| 11     | Barite, 15% in crude ore, in ground                             | $3.43 \times 10^{-6}$  | $1.68 \times 10^9$    | seJ/g  | $5.77 \times 10^6$    |
|        |                                                                 | $1.95 \times 10^{-10}$ |                       |        |                       |
| 12     | Basalt, in ground                                               | $2.75 \times 10^{-10}$ | $7.56 \times 10^9$    | seJ/g  | $1.47 \times 10^3$    |
|        |                                                                 | $1.06 \times 10^{-10}$ |                       |        |                       |
| 13     | Borax, in ground                                                | $1.06 \times 10^{-10}$ | $1.68 \times 10^9$    | seJ/g  | $4.61 \times 10^2$    |
|        |                                                                 | $1.06 \times 10^{-11}$ | $3.40 \times 10^{13}$ | seJ/g  |                       |
| 14     | Cadmium, 0.30% in sulfide, Cd 0.18%, Pb, Zn, Ag, In, in ground  | $10^{-11}$             | $10^{13}$             | seJ/g  | $3.62 \times 10^5$    |
| 15     | Calcite, in ground                                              | $8.77 \times 10^{-3}$  | $1.68 \times 10^9$    | seJ/g  | $1.47 \times 10^{10}$ |
| 16     | Carbon, in organic matter, in soil                              | $1.23 \times 10^{-8}$  | $2.77 \times 10^9$    | seJ/g  | $3.42 \times 10^4$    |
|        |                                                                 |                        | $1.14 \times 10^{10}$ |        |                       |
| 17     | Cerium, 24% in bastnasite, 2.4% in crude ore, in ground         | $1.43 \times 10^{-7}$  | $10^{10}$             | seJ/g  | $1.63 \times 10^6$    |
|        |                                                                 |                        | $1.50 \times 10^{11}$ |        |                       |
| 18     | Chromium, 25.5% in chromite, 11.6% in crude ore, in ground      | $5.39 \times 10^{-7}$  | $10^{11}$             | seJ/g  | $8.09 \times 10^7$    |
| 19     | Chrysotile, in ground                                           | $5.35 \times 10^{-8}$  | $1.68 \times 10^9$    | seJ/g  | $8.99 \times 10^4$    |
| 20     | Cinnabar, in ground                                             | $1.44 \times 10^{-8}$  | $1.68 \times 10^9$    | seJ/g  | $2.43 \times 10^4$    |
| 21     | Clay, unspecified, in ground                                    | $2.88 \times 10^{-4}$  | $4.80 \times 10^9$    | seJ/g  | $1.39 \times 10^9$    |
| 22     | Coal                                                            | $8.20 \times 10^{-1}$  | $5.71 \times 10^4$    | seJ/J  | $4.68 \times 10^{10}$ |
|        |                                                                 |                        | $1.30 \times 10^{11}$ |        |                       |
| 23     | Cobalt, in ground                                               | $2.89 \times 10^{-4}$  | $10^{11}$             | seJ/g  | $3.75 \times 10^{10}$ |
| 24     | Colemanite, in ground                                           | $7.62 \times 10^{-9}$  | $1.68 \times 10^9$    | seJ/g  | $1.28 \times 10^4$    |
|        |                                                                 |                        | $9.80 \times 10^{10}$ |        |                       |
| 25     | Copper, in ground                                               | $1.62 \times 10^{-6}$  | $10^{10}$             | seJ/g  | $1.59 \times 10^8$    |
|        |                                                                 | $3.37 \times 10^{-13}$ |                       |        |                       |
| 26     | Diatomite, in ground                                            | $10^{-13}$             | $1.68 \times 10^9$    | seJ/g  | $5.65 \times 10^{-1}$ |
|        |                                                                 |                        | $1.85 \times 10^{10}$ |        |                       |
| 27     | Dolomite, in ground                                             | $3.91 \times 10^{-6}$  | $10^{10}$             | seJ/g  | $7.24 \times 10^7$    |
| 28     | Energy, geothermal, converted                                   | $1.13 \times 10^{-3}$  | $4.52 \times 10^5$    | seJ/J  | $5.09 \times 10^8$    |
|        |                                                                 | $3.59 \times 10^{-10}$ |                       |        |                       |
| 29     | Europium, 0.06% in bastnasite, 0.006% in crude ore, in ground   | $10^{-10}$             | $1.68 \times 10^9$    | seJ/g  | $6.03 \times 10^2$    |
|        |                                                                 | $1.58 \times 10^{-14}$ |                       |        |                       |
| 30     | Feldspar, in ground                                             | $10^{-14}$             | $1.68 \times 10^9$    | seJ/g  | $2.66 \times 10^{-2}$ |
| 31     | Fluorine, in ground                                             | $8.34 \times 10^{-7}$  | $1.68 \times 10^9$    | seJ/g  | $1.40 \times 10^6$    |
| 32     | Fluorspar, 92%, in ground                                       | $1.77 \times 10^{-5}$  | $8.38 \times 10^8$    | seJ/g  | $1.48 \times 10^7$    |
|        |                                                                 | $8.96 \times 10^{-10}$ |                       |        |                       |
| 33     | Gadolinium, 0.15% in bastnasite, 0.015% in crude ore, in ground | $10^{-10}$             | $1.68 \times 10^9$    | seJ/g  | $1.50 \times 10^3$    |
| 34     | Gas, natural, in ground                                         | $1.11 \times 10^1$     | $6.83 \times 10^4$    | seJ/J  | $7.56 \times 10^{11}$ |
|        |                                                                 | $4.06 \times 10^{-17}$ | $5.00 \times 10^{11}$ |        |                       |
| 35     | Gold, in ground                                                 | $10^{-17}$             | $10^{11}$             | seJ/g  | $2.03 \times 10^{-2}$ |
|        |                                                                 | $1.54 \times 10^{-14}$ |                       |        |                       |
| 36     | Granite, in ground                                              | $10^{-14}$             | $8.40 \times 10^8$    | seJ/g  | $1.29 \times 10^{-2}$ |
| 37     | Gravel, in ground                                               | $1.05 \times 10^{-2}$  | $8.40 \times 10^8$    | seJ/g  | $8.79 \times 10^9$    |
| 38     | Gypsum, in ground                                               | $2.10 \times 10^{-8}$  | $2.85 \times 10^9$    | seJ/g  | $5.99 \times 10^4$    |
|        |                                                                 | $1.68 \times 10^{-13}$ | $4.03 \times 10^{11}$ |        |                       |
| 39     | Indium, 0.005% in sulfide, In 0.003%, Pb, Zn, Ag, Cd, in ground | $10^{-13}$             | $10^{11}$             | seJ/g  | $6.75 \times 10^1$    |
|        |                                                                 |                        | $1.20 \times 10^{10}$ |        |                       |
| 40     | Iron, 46% in ore, 25% in crude ore, in ground                   | $5.94 \times 10^{-6}$  | $10^{10}$             | seJ/g  | $7.13 \times 10^7$    |



|    |                                                                                               |                        |                       |       |                       |
|----|-----------------------------------------------------------------------------------------------|------------------------|-----------------------|-------|-----------------------|
| 41 | Kaolinite, 24% in crude ore, in ground                                                        | $3.57 \times 10^{-6}$  | $1.68 \times 10^9$    | sel/g | $6.00 \times 10^6$    |
| 42 | Kieserite, 25% in crude ore, in ground                                                        | $9.32 \times 10^{-10}$ | $1.68 \times 10^9$    | sel/g | $1.56 \times 10^3$    |
| 43 | Lanthanum, 7.2% in bastnasite, 0.72% in crude ore, in ground                                  | $4.30 \times 10^{-8}$  | $1.68 \times 10^9$    | sel/g | $7.22 \times 10^4$    |
| 44 | Lead, 5.0% in sulfide, Pb 3.0%, Zn, Ag, Cd, In, in ground                                     | $4.60 \times 10^{-11}$ | $4.80 \times 10^{11}$ | sel/g | $2.21 \times 10^4$    |
| 45 | Lithium, 0.15% in brine, in ground                                                            | $3.77 \times 10^{-13}$ | $9.27 \times 10^{11}$ | sel/g | $3.49 \times 10^2$    |
| 46 | Magnesite, 60% in crude ore, in ground                                                        | $2.85 \times 10^{-7}$  | $1.68 \times 10^9$    | sel/g | $4.78 \times 10^5$    |
| 47 | Manganese, 35.7% in sedimentary deposit, 14.2% in crude ore, in ground                        | $5.04 \times 10^{-4}$  | $10^{11}$             | sel/g | $1.76 \times 10^{11}$ |
| 48 | Metamorphous rock, graphite containing, in ground                                             | $3.33 \times 10^{-8}$  | $1.68 \times 10^9$    | sel/g | $5.58 \times 10^4$    |
| 49 | Molybdenum, 0.025% in sulfide, Mo $8.2 \times 10^{-3}\%$ and Cu 0.39% in crude ore, in ground | $1.29 \times 10^{-6}$  | $10^{11}$             | sel/g | $9.01 \times 10^8$    |
| 50 | Neodymium, 4% in bastnasite, 0.4% in crude ore, in ground                                     | $2.36 \times 10^{-8}$  | $1.68 \times 10^9$    | sel/g | $3.97 \times 10^4$    |
| 51 | Nickel, 1.13% in sulfide, Ni 0.76% and Cu 0.76% in crude ore, in ground                       | $2.19 \times 10^{-6}$  | $10^{11}$             | sel/g | $4.37 \times 10^8$    |
| 52 | Oil, crude, in ground                                                                         | $4.08 \times 10^1$     | $9.45 \times 10^4$    | sel/J | $3.86 \times 10^{12}$ |
| 53 | Olivine, in ground                                                                            | $6.06 \times 10^{-10}$ | $1.68 \times 10^9$    | sel/g | $1.02 \times 10^3$    |
| 54 | Pd, in ground                                                                                 | $1.80 \times 10^{-10}$ | $1.20 \times 10^{11}$ | sel/g | $2.16 \times 10^4$    |
| 55 | Phosphorus, 18% in apatite, 12% in crude ore, in ground                                       | $3.33 \times 10^{-6}$  | $10^{10}$             | sel/g | $6.89 \times 10^7$    |
| 56 | Praseodymium, 0.42% in bastnasite, 0.042% in crude ore, in ground                             | $2.51 \times 10^{-9}$  | $1.68 \times 10^9$    | sel/g | $4.21 \times 10^3$    |
| 57 | Pt, in ground                                                                                 | $5.57 \times 10^{-12}$ | $3.70 \times 10^{11}$ | sel/g | $2.06 \times 10^3$    |
| 58 | Rh, in ground                                                                                 | $4.99 \times 10^{-12}$ | $1.20 \times 10^{12}$ | sel/g | $5.98 \times 10^3$    |
| 59 | Rhenium, in crude ore, in ground                                                              | $1.44 \times 10^{-12}$ | $8.93 \times 10^{12}$ | sel/g | $1.29 \times 10^4$    |
| 60 | Samarium, 0.3% in bastnasite, 0.03% in crude ore, in ground                                   | $1.79 \times 10^{-9}$  | $1.68 \times 10^9$    | sel/g | $3.00 \times 10^3$    |
| 61 | Sand, unspecified, in ground                                                                  | $3.43 \times 10^{-8}$  | $1.68 \times 10^9$    | sel/g | $5.77 \times 10^4$    |
| 62 | Shale, in ground                                                                              | $5.14 \times 10^{-9}$  | $1.68 \times 10^9$    | sel/g | $8.64 \times 10^3$    |
| 63 | Silver, in ground                                                                             | $1.09 \times 10^{-16}$ | $4.50 \times 10^{11}$ | sel/g | $4.90 \times 10^{-2}$ |
| 64 | sodium bromide                                                                                | $4.19 \times 10^{-4}$  | $1.68 \times 10^9$    | sel/g | $7.03 \times 10^8$    |
| 65 | Sodium chloride, in ground                                                                    | $1.12 \times 10^{-2}$  | $1.68 \times 10^9$    | sel/g | $1.87 \times 10^{10}$ |
| 66 | Sodium nitrate, in ground                                                                     | $9.78 \times 10^{-15}$ | $1.68 \times 10^9$    | sel/g | $1.64 \times 10^{-2}$ |
| 67 | Sodium sulphate, various forms, in ground                                                     | $4.85 \times 10^{-6}$  | $1.40 \times 10^9$    | sel/g | $6.77 \times 10^6$    |
| 68 | Stibnite, in ground                                                                           | $3.50 \times 10^{-14}$ | $1.68 \times 10^9$    | sel/g | $5.88 \times 10^{-2}$ |
| 69 | Sulfur, in ground                                                                             | $1.45 \times 10^{-5}$  | $2.08 \times 10^{10}$ | sel/g | $3.03 \times 10^8$    |
| 70 | Sylvite, 25 % in sylvinitite, in ground                                                       | $1.87 \times 10^{-8}$  | $1.68 \times 10^9$    | sel/g | $3.14 \times 10^4$    |
| 71 | Talc, in ground                                                                               | $7.89 \times 10^{-8}$  | $2.80 \times 10^{10}$ | sel/g | $2.21 \times 10^6$    |
| 72 | Tantalum, 81.9% in tantalite, $1.6 \times 10^{-4}\%$ in crude ore, in ground                  | $3.96 \times 10^{-17}$ | $1.70 \times 10^{11}$ | sel/g | $6.73 \times 10^{-3}$ |
| 73 | Tellurium, 0.5ppm in sulfide, Te 0.2ppm, Cu and Ag, in crude ore, in ground                   | $5.33 \times 10^{-18}$ | $5.04 \times 10^{13}$ | sel/g | $2.69 \times 10^{-1}$ |
| 74 | Tin, 79% in cassiterite, 0.1% in crude ore, in ground                                         | $2.68 \times 10^{-10}$ | $1.70 \times 10^{12}$ | sel/g | $4.56 \times 10^5$    |
| 75 | TiO <sub>2</sub> , 54% in ilmenite, 2.6% in crude ore, in ground                              | $1.02 \times 10^{-5}$  | $3.82 \times 10^{10}$ | sel/g | $3.89 \times 10^8$    |
| 76 | Ulexite, in ground                                                                            | $2.02 \times 10^{-17}$ | $1.68 \times 10^9$    | sel/g | $3.39 \times 10^{-5}$ |
| 77 | Uranium, in ground                                                                            | $2.92 \times 10^{-6}$  | $1.60 \times 10^{11}$ | sel/g | $4.68 \times 10^8$    |
| 78 | Zinc, 9.0% in sulfide, Zn 5.3%, Pb, Ag, Cd, In, in ground                                     | $1.18 \times 10^{-6}$  | $7.20 \times 10^{10}$ | sel/g | $8.47 \times 10^7$    |
| 79 | Zirconium, 50% in zircon, 0.39% in crude ore, in ground                                       | $5.44 \times 10^{-17}$ | $3.18 \times 10^{10}$ | sel/g | $1.73 \times 10^{-3}$ |
| 80 | Magnesium, 0.13% in water                                                                     | $6.24 \times 10^{-18}$ | $1.68 \times 10^9$    | sel/g | $1.05 \times 10^{-5}$ |
| 81 | Water, cooling, unspecified natural origin                                                    | $3.81 \times 10^{-2}$  | $2.70 \times 10^5$    | sel/g | $1.03 \times 10^{10}$ |
| 82 | Water, lake                                                                                   | $7.32 \times 10^{-6}$  | $4.52 \times 10^5$    | sel/g | $3.31 \times 10^6$    |
| 83 | Water, process, unspecified natural origin                                                    | $3.56 \times 10^{-3}$  | $6.74 \times 10^4$    | sel/J | $4.93 \times 10^5$    |
| 84 | Water, river                                                                                  | $2.57 \times 10^{-2}$  | $3.41 \times 10^5$    | sel/g | $5.08 \times 10^9$    |
| 85 | Water, salt, ocean                                                                            | $3.37 \times 10^{-3}$  | $5.36 \times 10^4$    | sel/J | $1.37 \times 10^9$    |

|    |                                   |                       |                    |       |                       |
|----|-----------------------------------|-----------------------|--------------------|-------|-----------------------|
| 86 | Water, salt, sole                 | $7.07 \times 10^{-4}$ | $5.36 \times 10^4$ | seJ/J | $7.56 \times 10^8$    |
| 87 | Water, unspecified natural origin | $2.05 \times 10^{-3}$ | $3.06 \times 10^4$ | seJ/J | $9.05 \times 10^7$    |
| 88 | Water, well, in ground            | $2.86 \times 10^{-4}$ | $6.89 \times 10^4$ | seJ/J | $5.90 \times 10^8$    |
|    |                                   |                       | Energia            | seJ   | $5.00 \times 10^{12}$ |
|    |                                   |                       | UEV                | seJ/g | $5.00 \times 10^9$    |
